1 **Corticothalamic gating of population auditory thalamocortical transmission in**  
2 **mouse**

3  
4 Baher A. Ibrahim<sup>1,2</sup>, Caitlin Murphy<sup>5,6</sup>, Guido Muscioni<sup>4</sup>, Aynaz Taheri<sup>4</sup>, Georgiy  
5 Yudintsev<sup>3</sup>, Robert V. Kenyon<sup>4</sup>, Tanya Berger-Wolf<sup>4</sup>, Matthew I. Banks<sup>5,6</sup> and Daniel A.  
6 Llano<sup>1,2,3</sup>

7  
8 1- Department of Molecular and Integrative Physiology, University of Illinois at Urbana-  
9 Champaign, IL, USA.

10 2- Beckman Institute for Advanced Science and Technology, University of Illinois at  
11 Urbana-Champaign, IL, USA.

12 3- Neuroscience Program, University of Illinois at Urbana-Champaign, IL, USA.

13 4- Department of Computer Science, University of Illinois at Chicago, IL, USA.

14 5- Department of Neuroscience, School of Medicine and Public Health, University of  
15 Wisconsin-Madison, WI, USA.

16 6- Department of Anesthesiology, School of Medicine and Public Health, University of  
17 Wisconsin-Madison, WI, USA.

18

19

20 **Corresponding author:** Daniel A. Llano\*

21 \* 405 N. Mathews Avenue, Urbana, IL 61801.

22 E-mail: [d-llano@illinois.edu](mailto:d-llano@illinois.edu)

23

24 **Acknowledgments:** This work was supported by NSF1515587 , DC013073 and  
25 DC014765

26

27

28

29

30

31

32

33

34

35

36 **Abstract:**

37 Since the discovery of the receptive field, scientists have tracked receptive field structure  
38 to gain insights about mechanisms of sensory processing. At the level of the thalamus  
39 and cortex, this linear filter approach has been challenged by findings that populations of  
40 cortical neurons respond in a stereotyped fashion to sensory stimuli. Here, we elucidate  
41 a possible mechanism by which gating of cortical representations occurs. All-or-none  
42 population responses (here called “ON” and “OFF” responses) were observed in vivo and  
43 in vitro in the mouse auditory cortex at near-threshold acoustic or electrical stimulation.  
44 ON-responses were associated with previously-described UP states in the auditory  
45 cortex. OFF-responses in the cortex were only eliminated by blocking GABAergic  
46 inhibition in the thalamus. Opto- and chemogenetic silencing of NTSR-positive  
47 corticothalamic layer 6 (CTL6) neurons as well as the pharmacological blocking of the  
48 thalamic reticular nucleus (TRN) retrieved the missing cortical responses, suggesting that  
49 the corticothalamic feedback inhibition via TRN controls the gating of thalamocortical  
50 activity. Moreover, the oscillation of the pre-stimulus activity of corticothalamic cells  
51 predicted the cortical ON vs. OFF responses, suggesting that underlying cortical  
52 oscillation controls thalamocortical gating. These data suggest that the thalamus may  
53 recruit cortical ensembles rather than linearly encoding ascending stimuli and that  
54 corticothalamic projections play a key role in selecting cortical ensembles for activation.

55  
56  
57

58 **Introduction:**

59 Our interactions with the world depend on how the sensory information is transmitted,  
60 integrated, and processed in the nervous system. Most models of perception propose  
61 that activation of the cerebral cortex is critical for conscious experience of sensory stimuli.  
62 For most of our senses, the thalamus is a critical brain structure to allow information to  
63 reach the cortex. One view of thalamic function proposed that thalamus governs the  
64 sensory representation in the cortex by linearly transmitting the sensory information from  
65 lower sensory structures to the cortex. This view emerged after the descriptions of  
66 receptive field transformations in the visual system by Hubel and Wiesel (1). According  
67 to this idea, cortical activity patterns during sensory perception should be predictable  
68 based on activity patterns in the thalamus and patterns of synaptic convergence of  
69 thalamocortical neurons onto cortical neurons.

70 However, this view does not comport with findings that population activity in sensory  
71 cortices is often stereotyped and recapitulates patterns of cortical spontaneous activity  
72 (2-5). In addition, a linear filter model cannot explain the presence of formed complex  
73 hallucinations, which are associated with elevated activity in the primary sensory cortices  
74 (6-8). As such, a hypothesis has emerged that sensory representations are developed by  
75 early exposure to sensory stimuli and stored in the cortex in intracortical networks, and  
76 that the thalamus activates these pre-wired sensory representations upon sensory  
77 stimulation (2, 9). Some observations could support this hypothesis. For example,  
78 ongoing cortical activity which was reported *in-vivo* and *in-vitro* (4, 10) was found to be  
79 highly determined by the internal cortical connectivity (4, 11-13), totally independent on  
80 the thalamocortical afferents (2, 14, 15), and is the main platform for the generation of the  
81 internal percepts in memory and REM sleep (16, 17). In addition, despite substantial  
82 differences in the form and organization in the initial processing stages of different  
83 modalities of sensation, at the level of the thalamus and cortex, neural circuits across  
84 modalities are strikingly similar. These data suggest that there is a common function of  
85 thalamocortical circuits that is not tied to specific modalities of perception. Given that  
86 connected neuronal ensembles could be the main functional unit for behavior and  
87 cognition (18, 19), the ability of thalamocortical afferents to activate the same cortical  
88 circuits suggests that a major control point for the activation of cortical ensembles lies in  
89 the thalamus. Here, we examine the mechanisms of gating all-or-none population  
90 responses in the auditory cortex (AC) and show that ongoing oscillatory activity in layer 6  
91 corticothalamic projections gates the activation of cortical ensembles. The gating of  
92 cortical activity occurs via corticothalamic projection to the thalamic reticular nucleus  
93 (TRN), which is a long-enigmatic structure that partially surrounds and sends GABAergic  
94 projections to thalamocortical neurons. These findings suggest that at least one mode of  
95 thalamocortical function is to select particular groups of cortical neurons for activation  
96 based on feedback from corticothalamic neurons.

97

98

99

100

101

102

103

## 104 **Material and Methods**

### 105 **Animals:**

106 C57BL/6J (Jackson Laboratory, stock # 000664), C57BL/6J-Tg (Thy1-GCaMP6s)  
107 GP4.3Dkim/J a.k.a. GCaMP6s mice (Jackson Laboratory, stock # 024275), BALB/cJ  
108 (Jackson Laboratory, stock # 000651), Gad2-IRES-Cre (Jackson Laboratory, stock #  
109 010802), NTSR1-Cre (a generous gift from Dr. Gordon Shepherd from Northwestern  
110 University), and RBP4-Cre (received from cryopreserved stock from the Mutant Mouse  
111 Resource and Research Center (MMRRC, stock number 031125-UCD)) mice of both  
112 sexes were used. All applicable guidelines for the care and use of animals were followed.  
113 All surgical procedures were approved by the Institutional Animal Care and Use  
114 Committee (IACUC) at University of Illinois Urbana-Champaign. Animals were housed in  
115 animal care facilities approved by the American Association for Accreditation of  
116 Laboratory Animal Care (AAALAC).

117

### 118 ***In-vivo* imaging:**

119 The detailed procedures were described before [(20)]. In brief, GCaMP6s mice were used  
120 for transcranial *in-vivo* imaging of evoked calcium signals from the left auditory cortex  
121 (AC). For each experiment, the mouse was anesthetized with a mixture of ketamine and  
122 xylazine (100 mg/kg and 3 mg/kg respectively) delivered intraperitoneally. The animal's  
123 body temperature was maintained within the range of 35.5 and 37 °C using a DC  
124 temperature controller (FHC, ME, USA). A mid-sagittal and mid-lateral incisions were  
125 made to expose the dorsal and lateral aspects of the skull along with the temporalis  
126 muscle. The temporalis muscle was separated from the skull to expose the ventral parts  
127 of the underlying AC. The site was cleaned with sterile saline, and the surface of the skull  
128 was thinned by a specific drill. A small amount of dental cement (3M ESPE KETAC) was  
129 mixed to a medium level of viscosity and added to the head of the bolt just enough to  
130 cover it. The bolt was bonded to the top of the skull, and the dental cement was allowed  
131 to set.

132 An Imager 3001 Integrated data acquisition and analysis system (Optical Imaging Ltd.,  
133 Israel) was used to image the cortical responses to sound in mice. A microscope  
134 consisting of 85 mm f/1.4 and 50 mm f/1.2 Nikon lenses were mounted to an Adimec  
135 1000m high-end CCD camera (7.4 x 7.4-pixel size, 1004 X 1004 resolution), and centered  
136 above the left AC, focused approximately 0.5 mm below the surface of the exposed skull.  
137 Acoustic stimuli were generated using a TDT system 3 with an RP 2.1 Enhanced Real-  
138 Time Processor and delivered via an ES1 free field electrostatic speaker (Tucker-Davis  
139 Technologies, FL, USA), located approximately 8 cm away from the contralateral ear. All  
140 imaging experiments were conducted in a sound-proof chamber at 10 frames per second.  
141 500 ms pure tones of 5 kHz, 37 dB SPL, 100% amplitude modulated at 20 Hz were played  
142 every 10 seconds.  $\Delta F/F$  of evoked calcium signals following the sound presentation was  
143 obtained.

144

### 145 **Virus injection:**

146 To modulate specific cell types of animal's brain, Cre-technology was used to provide an  
147 expression of opto- or chemo-genetic probes in those specific cells after 11 days of viral  
148 injection at P4. The detailed procedures were described before [(21), in press]. For all  
149 neonates, cryoanesthesia was induced after five to ten minutes. A toe pinch was done to

150 confirm that the mice were fully anesthetized. A small animal stereotaxic instrument  
151 (David Kopf Instruments, Tujunga, CA) was used with a universal syringe holder (David  
152 Kopf Instruments, Tujunga, CA) and standard ear bars with rubber tips (Stoelting, Wood  
153 Dale, IL). The adaptor stage was cooled by adding ethanol and dry ice to the well. A  
154 temperature label (RLC-60-26/56, Omega, Norwalk, CT) was attached to the adaptor to  
155 provide the temperature of the stage during cooling. The temperature was kept above  
156 2°C to prevent hypothermia or cold-induced skin damage of the neonatal mice and below  
157 8°C to sustain cryoanesthesia. Glass micropipettes (3.5-inches, World Precision  
158 Instruments, Sarasota, FL) were pulled using a micropipette puller (P-97, Sutter  
159 Instruments, Novato, CA) and broken back to a tip diameter between 35-50µm. The  
160 micropipette was filled with mineral oil (Thermo Fisher Scientific Inc., Waltham, MA) and  
161 attached to a pressure injector (Nanoliter 2010, World Precision Instruments, Sarasota,  
162 FL) connected to a pump controller (Micro4 Controller, World Precision Instruments,  
163 Sarasota, FL). To target corticothalamic L6, layer 5 (L5), the AC of NTSR1-Cre (22-25)  
164 or RPB4-Cre (26, 27) neonates was injected with “eNpHR3.0” AAV1 (AAV-EF1a-DIO-  
165 eNpHR3.0-YFP) (Halorhodopsin-AAV) constructs from UNC Vector Core (Chapel Hill,  
166 NC) or Gi-coupled hM4Di DREADDs AAV8 (AAV8-DIO-hSyn-hM4Di-mCherry)  
167 (DREADDs-AAV) construct from Addgene (Cambridge, MA). The micropipette carrying  
168 the viral particles was first located above the AC at the left hemisphere at 1.5 mm anterior  
169 to lambda and just at the edge of the skull’s flat horizon. The tip was lowered to 1.2 mm  
170 from the brain surface, then it was pulled back to 1.0 mm for the first injection where 200  
171 nL of Halorhodopsin-AAV or DREADDs-AAV was injected at 200 nL/min. After the  
172 injection was finished, the micropipette was left in the brain for 1 minute before removing  
173 to allow the injectate to settle into the brain. Following the first injection, the tip was pulled  
174 back stepwise in 0.1 mm increments, and 200 nL of the injectate was injected at every  
175 step until the tip reached 0.3mm from the surface. In total, 1600 nL of AAV was injected  
176 into the AC. The incision was sutured using 5/0 thread size, nylon sutures (CP Medical,  
177 Norcross, GA). To target the GABAergic cells of the inferior colliculus (IC), the IC of  
178 GAD2-Cre (28-30) neonatal mice was injected with Ha-AAV following the same  
179 procedures showing above, but the micropipette loaded by Ha-AAV was located over the  
180 IC at the left hemisphere at 2.0 mm posterior to lambda and 1.0 mm laterally from the  
181 midline. The neonates were transferred back onto a warming pad to recover. After 5-7  
182 minutes, their skin color was returned to normal and they started moving. After recovery,  
183 all neonates were returned to their nest with the parents.

184

#### 185 **Brain slicing:**

186 For all *in-vitro* experiments, 15-18 days old mice were initially anesthetized with ketamine  
187 (100 mg/ kg) and xylazine (3 mg/kg) intraperitoneally and transcardially perfused with  
188 chilled (4 °C) sucrose-based slicing solution containing the following (in mM): 234  
189 sucrose, 11 glucose, 26 NaHCO<sub>3</sub>, 2.5 KCl, 1.25 NaH<sub>2</sub>PO<sub>4</sub>, 10 MgCl<sub>2</sub>, 0.5 CaCl<sub>2</sub>. After the  
190 brain was taken out, it was cut to obtain auditory colliculo-thalamocortical brain slice  
191 (aCTC) as shown (Figure S1) and as described before (31-33). 600 µm thick horizontal  
192 brain slices were obtained to retain the connectivity between inferior colliculus (IC), medial  
193 geniculate body (MGB), thalamic reticular nucleus (TRN) and AC. All slices were  
194 incubated for 30 min in 33 °C in a solution composed of (in mM: 26 NaHCO<sub>3</sub>, 2.5 KCl, 10  
195 glucose, 126 NaCl, 1.25 NaH<sub>2</sub>PO<sub>4</sub>, 3 MgCl<sub>2</sub>, and 1 CaCl<sub>2</sub>). After incubation, all slices were

196 transferred to a perfusion chamber coupled to an upright Olympus BX51 microscope,  
197 perfused with artificial cerebrospinal fluid (ACSF) containing (in mM) 26 NaHCO<sub>3</sub>, 2.5  
198 KCl, 10 glucose, 126 NaCl, 1.25 NaH<sub>2</sub>PO<sub>4</sub>, 2 MgCl<sub>2</sub>, and 2 CaCl<sub>2</sub>. Another set of  
199 experiments was done at a different lab [Dr. Matthew I. Banks (Madison, WI)] to exclude  
200 any experimental factors related to our lab environment, chemicals, or anesthesia. As  
201 reported by the lab (34), following full anesthesia by isoflurane, C57BL/6J mouse was  
202 immediately decapitated without cardiac perfusion, the animal's brain was extracted and  
203 immersed in cutting artificial CSF [cACSF; composed of (in mM) 111 NaCl, 35 NaHCO<sub>3</sub>,  
204 20 HEPES, 1.8 KCl, 1.05 CaCl<sub>2</sub>, 2.8 MgSO<sub>4</sub>, 1.2 KH<sub>2</sub>PO<sub>4</sub>, and 10 glucose] at 0–4°C.  
205 Slices were maintained in cACSF at 24°C for >1 h before transfer to the recording  
206 chamber, which was perfused at 3–6 ml/min with ACSF [composed of (in mM) 111 NaCl,  
207 35 NaHCO<sub>3</sub>, 20 HEPES, 1.8 KCl, 2.1 CaCl<sub>2</sub>, 1.4 MgSO<sub>4</sub>, 1.2 KH<sub>2</sub>PO<sub>4</sub>, and 10 glucose].  
208 All the solutions were bubbled with 95% oxygen/5% carbon dioxide.

209

### 210 **Electrical stimulation:**

211 All the electrical stimulation protocols in the IC evoked the same cortical response modes.  
212 Following the electrical stimulation of IC, the first step was always to get a neuronal  
213 activation in all brain structures involved in the auditory circuit to make sure that aCTC  
214 slice retains the synaptic connection between IC, MGB, TRN, and AC. For imaging the  
215 cortical activation, one second electrical train pulses of (250uA, 40Hz, 1ms pulse width)  
216 to IC was the main stimulating protocol as described before (31). However, one second  
217 long of electrical stimulation was not suitable for electrophysiology experiments to record  
218 any post-stimulus signals that could be buried by the stimulus artifact. Other IC stimulating  
219 protocols were used. For whole cell and LFP recording, the stimulation of IC by (3 ms  
220 long train pulses, 300-500 uA, 1000 Hz, 1ms pulse width) or (100 ms long train pulses,  
221 250uA, 40 Hz, 1ms pulse width) was used. The electrical stimulation was done by a  
222 concentric bipolar electrode (Cat#30201, FHC) every 10-20s. The parameters of the  
223 electrical pulses were adjusted by a B&K precision wave generator (model # 4063) and  
224 World Precision Instruments stimulation isolator (A-360).

225

### 226 **Calcium (Ca) and flavoprotein (FA) Imaging:**

227 For Ca imaging, GCaMP6s mouse or loading CAL-520, AM (Cal-520, AM (Abcam,  
228 ab171868) calcium dye was used. For CAL-520, AM calcium dye loading, the brain slicing  
229 protocol was followed, but the aCTC slices were incubated in (48 ul of DMSO dye solution,  
230 2 ul of Pluronic F-127 (Cat# P6866, Invitrogen), and 2.5 ml of the incubating solution) at  
231 35-36 °C for 25-28 minutes according to (R). The slices then were incubated in the normal  
232 incubating solution (shown above) for 30 minutes to wash the extra extracellular dye.  
233 Imaging was done under ACSF perfusion as described before. Depending on the  
234 experiment, the evoked Ca or FA signals following IC stimulation were tracked using a  
235 stable DC fluorescence illuminator (Prior Lumen 200) and a U-M49002XI E-GFP Olympus  
236 filter cube set [excitation: 470–490 nm, dichroic 505 nm, emission 515 nm long pass, 100  
237 ms exposure time for FAD and 5 ms for calcium signals]. All data were collected using  
238 Retiga EXi camera of a frame rate as 4 Hz for FAD and 10 Hz for Ca imaging. The peak  
239 of the signals was detected by placing ROI on the brain regions (IC, MGB, or AC) or the  
240 individual cortical or thalamic cells.  $\Delta F/F$  of FA responses from IC, MGB, AC was obtained  
241 for further analysis.

242

243 **Pharmacological intervention:**

244 To disinhibit the inhibitory inputs globally, GABA $\alpha$ -R antagonist (35), SR-95531  
245 (gabazine, Cat# 1262, Tocris) was added to the perfused ACSF solution (200 nM). To  
246 specifically disinhibit the inhibitory inputs in either MGB or AC, a continuous flow of  
247 gabazine (200 nM) was injected through a glass pipette (Broken tip, 35  $\mu$ M) which was  
248 connected to a picospritzer (TooheyCompany, New Jersey, USA). The pipette was filled  
249 by a solution composed of (1ml ACSF+10ul Alexa Fluor 594 hydrazide, sodium salt dye,  
250 Cat#A10438, Invitrogen). The dye was used to visualize the flow of the solution and to  
251 make sure it is only going to the site of injection. The injection was done under 10 psi  
252 pressure for 5 minutes and continuously during imaging. As reported before, to block TRN  
253 activity (36, 37), AMPA receptor blocker, 20  $\mu$ M of NBQX (Cat# 0373, Tocris) was injected  
254 to TRN of the aCTC slice following the same described procedures. The chemical  
255 inhibition of CTL6 cells was conducted by a global perfusion of clozapine-n-oxide (CNO,  
256 5 $\mu$ M, Cat# 4936, Tocris), the chemical actuator of the chemogenetic probe, hM4Di (38)  
257 that was solely expressed in CTL6 of NTSR1-Cre mouse after viral injection.

258

259 **Electrophysiology and photoinhibition:**

260 Whole-cell recording of cortical layer 4 (L4), CTL6, or MGB cells was performed using a  
261 visualized slice setup outfitted with infrared-differential interference contrast optics.  
262 Recording pipettes were pulled from borosilicate glass capillary tubes and had tip  
263 resistances of 2–5 M $\Omega$  when filled with potassium gluconate based intracellular solution  
264 (in mM: 117 K-gluconate, 13 KCl, 1.0 MgCl<sub>2</sub>, 0.07 CaCl<sub>2</sub>, 0.1 ethyleneglycol-bis(2-  
265 aminoethylether)- N,N,N',N'-tetra acetic acid, 10.0 4-(2-hydroxyethyl)-1-  
266 piperazineethanesulfonic acid, 2.0 Na-ATP, 0.4 Na-GTP, and 0.5% biocytin, pH 7.3) for  
267 current-clamp mode. Voltage was clamped at -60 mV or +10 mV to measure either the  
268 excitatory or inhibitory currents, respectively, using cesium-based intracellular solution (in  
269 mM: 117.0 CsOH, 117.0 gluconic acid, 11.0 CsCl, 1.0 MgCl<sub>2</sub>\*6H<sub>2</sub>O, 0.07 CaCl<sub>2</sub>, 11.0  
270 EGTA, 10.0 HEPES). Local field potential (LFP) recordings were done using glass pipette  
271 with a broken tip (>5 $\mu$ m and <10  $\mu$ m) to only allow passing a current around (>500 pA  
272 and <1.4 pA as indicated by the membrane test) under a current clamp mode at gain =  
273 100, Bessel = 4kHz. For LFP signals, the data were filtered offline using Clampfit 10.7  
274 software under Gaussian low pass frequency at 300 Hz as well as filtering out the  
275 electrical interference at 60Hz. Multiclamp 700B amplifier and pClamp software  
276 (Molecular Devices) were used for data acquisition (20 kHz sampling).

277 For photoinhibition, the halorhodopsin “eNpHR3.0” probe expressed selectively at  
278 either CTL6, L5, or IC-GABAergic cells was activated by illuminating a far yellow light  
279 (565 nm) obtained from DC fluorescence illuminator (Prior Lumen 200) and Olympus filter  
280 cube (U-MF2, Olympus, Japan) which was implemented with TxRed-4040C-000  
281 [excitation:562/40 nm, dichroic 593 nm long pass, emission: 624/40 nm]. The light was  
282 set to shine the whole filed of the LFP recording chamber using 4X objective for three  
283 seconds extending from one second pre-stimulus and two seconds after the onset of IC  
284 stimulation. Based on the initial results related to the dynamics of CTL6 cells, the three  
285 seconds illumination was chosen to cover the time period one second before the onset of  
286 the stimulus.

287

## 288 **Brain network analysis:**

289 The method that was reported before (39) and figure S2A shows an overview of the brain  
290 network analysis. In this work, we propose an unsupervised framework for brain network  
291 classification and investigate how to model and describe neuronal networks using deep  
292 neural networks (40). In our framework, we utilize a network embedding method (41) to  
293 find effective representations for brain networks. The dataset used was images of the  
294 evoked FA signals obtained from IC, MGB, TRN, and AC of the aCTC slice. 100 instances  
295 from each of these brain regions were used. Each instance had one of the ON or OFF  
296 labels and consisted of 450 consecutive images from the specific region of the brain. The  
297 images of aCTC brain slices have a size of 172\*130 pixels. The intensity of the pixels  
298 could be detected from these images, and the change of the pixel value could be  
299 interpreted as the firing of the underlying group of neurons corresponding to the given  
300 pixel. By observing the variation of the pixel value over time, we were able to capture the  
301 dynamicity of the signal traveling in the brain slice. A sliding window process was used to  
302 grab the timeseries slices between a certain interval. Figure S2B indicates two non-  
303 overlapping windows and generated networks for visual purposes, though the algorithm  
304 adopts a stride of one timestamp to capture the system evolution at a fine-grained level.  
305 For each window, the Pearson product-moment correlation coefficient between all pairs  
306 of pixels was calculated and if the correlation was higher than a threshold then an edge  
307 with weight equal to the correlation was put between the two nodes representing the two  
308 pixels. In our unsupervised architecture, the goal was to learn network embeddings such  
309 that networks with similar structure lie close to one another in the embedding space. Two  
310 mutually exclusive classes ON/OFF indicating the existence/non-existence of the cortical  
311 event, respectively, were used to train and test the classifier. We aimed to learn a  
312 mapping function  $\Phi: G \rightarrow \mathbb{R}^k$  that embeds a network  $G$  into a  $k$ -dimensional space. Our  
313 approach used encoder-decoder models (autoencoders) which were trained to  
314 reconstruct their input in a way that learn useful properties of the data. The encoder  
315 mapped the input to some intermediate representation and the decoder attempted to  
316 reconstruct the input from this intermediate representation. The first step to run that was  
317 extracting the sequences from the brain networks. we choose LSTMs (Long short-term  
318 memory) (42) for both the encoder and decoder, forming an LSTM autoencoder (43).  
319 *LSTM* autoencoders use one LSTM to read the input sequence and encode it to a fixed  
320 dimensional vector, and then use another LSTM to decode the output sequence from the  
321 vector. Given the trained encoder  $LSTM_{enc}$ , we defined the network embedding function  
322  $\Phi(G)$  as the mean of the vector's output by the encoder for network sequences extracted  
323 from  $G$ :

$$\Phi(G) = \frac{1}{|Seq(G)|} \sum_{s \in Seq(G)} LSTM_{enc}(s)$$

324 where  $Seq(G)$  is the set of sequences extracted from  $G$ . Then,  $\Phi(G)$  is used as the  
325 representation of the network  $G$ .

326 We used random walks to generate sequences from brain networks. These  
327 sequences are then used to train our LSTM autoencoders. Given a network and a starting  
328 node, we selected a neighbor of it at random, and move to this neighbor; then we select  
329 a neighbor of this point at random, and move to it etc. The random sequence of nodes  
330 selected in this way is a random walk on the network. Given a source node  $u$ , we generate  
331



332 a random walk  $w_u$  with fixed length  $m$ . Let  $v_i$  denote the  $i^{\text{th}}$  node in  $w_u$ , starting with  $v_0=u$ .  
333 Then,  $v_{t+1}$  is a node from the neighbors of  $v_t$  that was selected with probability  $1/d(v_t)$ ,  
334 where  $d(v_t)$  is the degree of  $v_t$ . Figure S2C shows several extracted sequences from a  
335 brain network. Each node has an identification number according to the position of the  
336 pixel at the brain image. Further, we formulated network representation learning as  
337 training an autoencoder on node sequences generated from networks. These  
338 autoencoders were based on the sequence-to-sequence learning framework (44) [7], an  
339 LSTM-based architecture in which both the inputs and outputs are sequences of variable  
340 length. The architecture used one LSTM as the encoder  $LSTM_{enc}$  and another LSTM as  
341 the decoder  $LSTM_{dec}$ . An input sequence with length  $m$  is given to  $LSTM_{enc}$  and its  
342 elements were processed one per time step. The hidden vector  $h_m$  at the last time step  
343  $m$  is the fixed-length representation of the input sequence. This vector is provided as the  
344 initial vector to  $LSTM_{dec}$  to generate the output sequence. We used the sequence-to-  
345 sequence learning framework for autoencoding by using the same sequence for both the  
346 input and output. We trained the autoencoder such that the decoder  $LSTM_{dec}$  reconstructs  
347 the input using the final hidden vector from  $LSTM_{enc}$  (Figure S2D). We trained a single  
348 autoencoder for each region of the brain. The autoencoder is trained on a training set of  
349 network sequences pooled across all networks in a region of the brain. After training the  
350 autoencoder, we obtain the representation  $\Phi(G)$  for a single network  $G$  by encoding its  
351 sequences  $s \in \text{Seq}(G)$  using  $LSTM_{enc}$ , then averaging its encoding vectors. We used  
352  $(h_t)^{enc}$  to denote the hidden vector at time step  $t$  in  $LSTM_{enc}$ , and  $(h_t)^{dec}$  to denote the  
353 hidden vector at time step  $t$  in  $LSTM_{dec}$ :

$$354 \quad h_t^{enc} = LSTM_{enc}(v_t, h_{t-1}^{enc})$$

355 Where  $v_t$  is the  $t^{\text{th}}$  node in a sequence. The hidden vector at the last time step  
356  $(h_{last})^{enc} \in R^d$  denotes the representation of the input sequence, and was used as the  
357 hidden vector of the decoder at its first-time step:

$$358 \quad h_0^{dec} = h_{last}^{enc}$$

359 The last cell vector of the encoder was copied over an analogous way. Then each decoder  
360 hidden vector  $(h_t)^{dec}$  is computed based on the hidden vector and node from the previous  
361 time step:

$$362 \quad h_t^{dec} = LSTM_{dec}(v_{t-1}, h_{t-1}^{dec})$$

363 The decoder used  $(h_t)^{dec}$  to predict the next node  $v_t$ . For evaluation, we used SVM  
364 classifier to classify the brain network representations obtained from our approach (45).  
365 The 10-fold cross-validation technique was utilized for the training and test purposes. At  
366 each iteration nine folds are used as training data and one-fold as the test case. The  
367 average accuracy on the test folds is reported as the final accuracy.

### 368 **Classification of the activation state of pre-stimulus activity of CTL6 cells:**

370 One second of the pre-stimulus activity of CT-L6 was collected under current clamp  
371 modes. The data were down-sampled from 20kHz to 1KHz simplification by using  
372 Calmpfit 10.7 software offline. The one-second data set contained 1000 samples indexed  
373 in milliseconds for each stimulation. A total of 314 stimulations of IC across 17 cells  
374 obtained from 4 brain slices across three animals provided a balanced incidence between  
375 ON (55.09%) vs OFF (44.91%) cortical response. Before model training, the dataset  
376 underwent preprocessing steps. In order to analyze only the physiologically related  
377 frequencies, the frequencies between 0Hz and 50Hz were kept. The filtering procedure

378 consisted of a low-pass filter of order 4. In this way, the filter could correctly remove the  
379 frequencies over 50Hz while maintaining the closest phase-shift possible. The Python  
380 library for time series feature extraction tsfresh (46) was used to process the dataset  
381 extracting time series features that were used for the subsequent analysis, including the  
382 first 50 components of the Fast Fourier Transform (FFT) (47), parameters of a fitted linear  
383 regression, entropy (represents the amount of regularity or the level of disorder of the  
384 time series), autocorrelation variance and mean, as well as the simple statistics of the  
385 time series such as mean, variance and standard deviation. Feature selection (48) was  
386 performed to select a subset of most informative features. We removed features whose  
387 values did not change across all observations. Using a threshold value of 0.6, the cross-  
388 correlation was computed for all features to allow the removal of the intercorrelated  
389 features that contains the same information for the classification purpose. Finally, the  
390 combining scores from ANOVA (49) and mutual information (50) tests were used to  
391 retrieve the 10 most informative features that were used for model training. XGBoost  
392 implementation (51) of the gradient boosting model (52) was used for model training. The  
393 binary logistic objective function with a linear booster was chosen as the best fit for the  
394 classification task. For model testing, 3-fold cross validation with 10 repetitions was used  
395 (53). Results were then aggregated over all partitions and cross-validations and the mean  
396 and standard deviation was computed. The metrics used to evaluate the model were  
397 accuracy and F1-score (54). The accuracy is the homogenous measure among all the  
398 possible techniques used for the time series classification, thus it will make the results  
399 comparable to other possible models. F1 takes into consideration the misclassification  
400 error for each class and is explicit about the relative accuracy for each class. The  
401 considered baseline is a majority classifier, that is a simple model that always predicts  
402 ON class, which has the accuracy equal to 55.09% and F1-score of 71.04% for the ON  
403 class and 0% for the OFF class.

404

#### 405 **Imaging analysis and statistics:**

406 Using customized MATLAB codes, all the pseudocolor images were produced showing  
407 the tonotopic map of AC *in-vivo* and the activated brain regions in the aCTC slice. The  
408 peaks of FA or Ca signals as well as  $\Delta f/f$  were all computed by Image J software after  
409 drawing ROI above the brain region or the individual cell. All the statistical analysis as  
410 well as the graphs showing the statistical results were done by Origin-Pro 2017 software.  
411 Tests including  $\chi$ -square, linear correlation fitting, paired t, Repeated measures one-way  
412 ANOVA followed by Bonferroni post-test were used across all the work. The significance  
413 of the test was set when p-value < 0.05.

414

#### 415 **Work art:**

416 All figures were designed and made using Adobe illustrator as a part of online Adobe  
417 cloud. To keep working within Adobe environment to avoid losing the resolution of the  
418 figures, Adobe Photoshop was used to crop the borders of some images to save a space,  
419 drawing some scale bars, increasing the darkness and gamma balance of grayscale  
420 images showing the electrophysiology recording to be able to show the tiny signals, and  
421 writing some titles.

422

423

424

## 425 **Results:**

### 426 **Stochastic AC responses to sound presentations *in-vivo*:**

427 Consistent with previous work (55), the transcranial Ca imaging of the AC of an  
428 anesthetized GCaMP6s mouse following repeated presentations of a 5 kHz-37 dB SPL  
429 pure tone to the mouse's right ear (Figure 1A) showed a cortical activity at three distinct  
430 areas, the primary AC (A1), secondary AC (A2), and anterior auditory field (AAF) as  
431 indicated by sound-evoked Ca-signals shown by MATLAB pseudocolor image (Figure  
432 1B). Such sound-evoked cortical activity (Figure 1B) represented the average of the  
433 cortical responses to 10 presentations of the same tone. In contrast, there was  
434 stochasticity in the cortical responses following the repeated presentations of the same  
435 sound as reported by our lab (20). Here, the  $\Delta f/f$  of the sound-evoked Ca signals from A1  
436 was computed for every individual trial of sound presentation, and the data showed all-  
437 or-none cortical response (Figure 1C). Across the 40 trials of the same sound  
438 presentation, the A1 showed a full population response (here called ON cortical  
439 responses) or no response (referred to here as OFF responses). ON cortical responses  
440 were randomly interrupted by OFF responses (Figure 1C). Collectively, a histogram of  
441  $\Delta f/f$  of sound-evoked Ca-signals of A1 across trials showed two classes of A1 responses  
442 (ON vs OFF) (Figure 1D), best represented by a bimodal distribution. (Figure 1E).

443

### 444 **Stochastic AC responses to electrical stimuli to IC *in-vitro*:**

445 To examine the circuit mechanisms underlying the stochasticity of the responses, brain  
446 slices that retained connectivity between the IC, MGB, TRN and AC were used. The  
447 aCTC mouse brain slice (31-33), had an advantage that it retains the synaptic  
448 connections between these structures: hence, electrical stimulation of the IC was able to  
449 evoke a neuronal activity in all of these brain structures indicated by stimulus-evoked FA  
450 and Ca-signals as shown in Figure 2A and B. Both images showed only the average of  
451 the stimulus-evoked activity of the connected brain structures in the aCTC slice after  
452 several trials of IC stimulation. In contrast, the time series of  $\Delta f/f$  of the stimulus-evoked  
453 FA and Ca signals across trials of IC stimulation (Figure 2A and B) showed missing  
454 responses at the AC, which was consistent with the *in-vivo* data, despite that MGB, TRN,  
455 and IC were always responsive. Looking more closely at the activity of cortical L4 cells,  
456 the stimulus-evoked Ca signals of some L4 cells following the IC stimulation showed that  
457 each L4 cell had its own profile of responsiveness across trials, but all ceased to respond  
458 at trial # 9 and 11, for instance (Figure 2C). To ensure that metabolic or imaging artifact  
459 did not drive the observation of these missing cortical responses, whole cell recording of  
460 L4 cells as well as LFP recording of L3/4 were conducted. During the OFF cortical  
461 responses indicated by the absence of FA signals, L4 cells did not fire action potentials  
462 (Figure 2D), and similarly, there were no LFP signals recorded from cortical L3/4 (Figure  
463 2E), which implicated that FA imaging reflected the real status of the cortical activity  
464 following the stimulus presentation, and the missing cortical responses represented a lack  
465 of signal propagation within the cortex. Interestingly, during ON cortical responses, the IC  
466 stimulation evoked a cortical UP state in L4 cells, which was associated with many action  
467 potentials (Figure 2D, red box). Consistent with that, LFP recordings showed post-  
468 stimulus strong responses during ON cortical responses following the stimulation of the  
469 IC as reported before (56) (Figure 2E, green box). Stochastic AC responses were also

470 seen in brain slices prepared using a different anesthetic (isoflurane) without trans cardiac  
471 perfusion and in a laboratory with a biphasic stimulator vs. monophasic stimulator. The  
472 results in this case were identical (figure S3), suggesting that the stochastic responses  
473 were not specific to a particular test preparation.

474 OFF cortical responses occurred only after electric stimulation of IC, and not by the  
475 direct stimulation of MGB or the subcortical white matter (Figure S3). According to the  
476 observation that the OFF responses were shown only by the AC despite the activation of  
477 the other subcortical brain structures of the circuit in the aCTC slice, the images of the  
478 evoked FA signals at the subcortical structures (IC, MGB, and TRN) following the IC  
479 stimulation were analyzed using a deep learning algorithm (41) to determine which  
480 subcortical structure could best predict whether a cortical response would be an ON or  
481 an OFF response based on a trained classifier SVM (45). Figure S2E shows a few  
482 examples of the correlation networks constructed from our data. The blue points are the  
483 network's nodes that represented the activated pixels of the image indicated by evoked  
484 FA signals following the IC stimulation. These representations were used in a brain  
485 network classification task using our proposed model on each subcortical structure  
486 separately and compared the accuracy of classification on these structures. SVM  
487 classifier showed that the activated pixels of MGB following IC stimulation had a higher  
488 accuracy (81%) for the classification between ON and OFF cortical responses compared  
489 to 78% for IC and 74% for TRN. Such finding suggested that MGB could play a critical  
490 role in modulating the cortical activity.

491

#### 492 **The OFF cortical responses are driven by inhibition in the MGB.**

493 Since the OFF cortical response represented a full absence of stimulus-evoked cortical  
494 activity, we reasoned that OFF cortical responses could be driven by inhibition. To do  
495 that, the global disinhibition in the aCTC slice by bath application of gabazine, the  
496 GABA $\alpha$ -R blocker, was conducted. Under simultaneous FA imaging and IC stimulation,  
497 gabazine perfusion was able to retrieve all missing cortical responses compared to control  
498 and washing indicated by the  $\Delta f/f$  of evoked cortical FA signals (Figure 3A), which  
499 suggested that the OFF cortical responses were driven by inhibitory inputs. The AC and  
500 MGB were further investigated to search for the site of inhibition that drove such OFF  
501 cortical responses. Rationally, observing evoked post-stimulus IPSCs from any of these  
502 brain structures during the OFF cortical responses could lead to uncovering the site of  
503 inhibition. As such, the whole cell recording of cortical L4 or MGB cells at +10 mV voltage  
504 clamp was conducted simultaneously with FA imaging following the stimulation of the IC  
505 to track the IPSCs in two cell types during ON vs OFF cortical responses. Although L4  
506 cells demonstrated a surge of evoked post-stimulus IPSCs during ON cortical responses,  
507 they did not show any evoked post-stimulus IPSCs during OFF cortical responses which  
508 suggested that cortex did not receive inhibitory signals during OFF cortical responses  
509 (Figure 3B). In contrast, MGB cells showed evoked post-stimulus IPSCs following every  
510 trial of the IC stimulation during ON and OFF cortical responses (Figure 3B), which was  
511 consistent with the fact that MGB is always active after each trial of IC stimulation (Figure  
512 2). However, the inhibitory and excitatory currents received by MGB cells were further  
513 analyzed to investigate any change in both currents during ON vs OFF cortical responses.  
514 Interestingly, the evoked post-stimulus IPSCs in the MGB cells were larger during OFF  
515 compared to ON cortical responses with no difference in the net excitatory transferred

516 charges (Figure 3C). This finding suggests that MGB cells receive more inhibition during  
517 OFF cortical responses with no change in excitation, which led us to hypothesize that  
518 MGB activity could be modulated by inhibitory inputs during the OFF cortical responses.  
519 To test this hypothesis, the disinhibition in the MGB was examined to determine if it can  
520 retrieve the missing cortical responses. Under simultaneous FA imaging and IC  
521 stimulation, the specific injection of gabazine into MGB nucleus in the aCTC slice was  
522 able to retrieve the missing cortical FA signals indicated by the  $\Delta f/f$  of the evoked cortical  
523 FA signals (Figure 3D). In contrast, the selective gabazine injection into the AC was not  
524 able to retrieve the missing cortical responses (Figure 3D), which was consistent with the  
525 outcome of electrophysiology data obtained from the whole cell recording of L4 cells  
526 (Figure 3B). Accordingly, these data confirmed that the OFF cortical responses could be  
527 driven by thalamic inhibition.

528

### 529 **CTL6 cells are the main driver of the missing cortical response via TRN.**

530 Further work was done to investigate from where MGB received these inhibitory inputs to  
531 drive the cortical OFF responses. As previously reported, MGB can be inhibited mainly  
532 by IC through the feedforward inhibition by IC GABAergic cells (57, 58) or by the cortex  
533 through the feedback inhibition by TRN (59). As such, the disinhibition of these pathways  
534 was examined to determine if it can retrieve the missing cortical responses. For inhibition  
535 of the feedforward inhibition, the IC of neonatal GAD2-Cre mice was injected with  
536 halorhodopsin-AAV virus (See Methods) to induce the expression of eNpHR3.0 or  
537 halorhodopsin specifically in the GABAergic cells of the IC in a Cre-dependent manner.  
538 As expected, GABAergic cells of the IC as well as their projections to MGB expressed  
539 halorhodopsin indicated by the presence of YFP (Figure S5A). The photoinhibition of  
540 GABAergic cells of the IC by full field illumination of 565 nm light was not able to retrieve  
541 the missing cortical responses indicated by no recovery of the post-stimulus LFP signals  
542 recorded from L3/4 (Figure S5B). The statistical analysis showed no significant difference  
543 in the probability of ON cortical responses with and without the photo-inhibiting light  
544 (Figure S5C), which suggested that the OFF cortical responses were not driven by the  
545 feedforward inhibition of MGB. CTL6 cells also send inhibitory signals to thalamic cells  
546 through indirect inhibitory synapses via TRN, a shell-like structure of GABAergic neurons  
547 that surrounds the most of dorsolateral part of the thalamus (60-63). Therefore, the  
548 feedback inhibition of MGB via CTL6-TRN pathway was examined. The injection of the  
549 AC of NTRS1-Cre neonates with Ha-AAV1 resulted in a successful Cre-dependent  
550 expression of eNpHR3.0 receptors in the CTL6 as well as their projections to TRN and  
551 MGB (Figure 4A). Interestingly, the photoinhibition of CTL6 cells by full field illumination  
552 of 565 nm light resulted in a significant increase of the probability of ON cortical responses  
553 as indicated by the recovery of the post-stimulus LFP signals from L3/4 compared to the  
554 control (No light) (Figure 4A). To further prove the previous outcome, the AC of a separate  
555 group of NTRS1-Cre neonates was injected with DREADDs-AAV virus, which resulted in  
556 a successful Cre-dependent expression of the inhibitory chemogenetic receptors, hM4Di,  
557 as indicated by m-cherry tag specifically in CTL6 cells as well as their projections to TRN  
558 and MGB (Figure S6A). Consistent with the previous data, the chemical inhibition of CTL6  
559 cells expressing hM4Di receptors by their chemical actuator, CNO, significantly increased  
560 the frequency of ON cortical responses as indicated by  $\Delta f/f$  of evoked cortical FA signals  
561 compared to the control (Figure S6B and C). Given that CTL6 cells project to MGB

562 through a direct excitatory synapse, further examination was required to test if the TRN  
563 is the main driver of CTL6 effect. Blocking of the TRN activity by the NBQX, the AMPA-R  
564 blocker (36, 37), which was specifically injected into TRN, significantly increased the  
565 probability of ON cortical events indicated by  $\Delta f/f$  of the evoked cortical FA signals (Figure  
566 4B). Accordingly, based on the data shown in figure 4, we conclude that the OFF cortical  
567 responses were driven by the feedback inhibition of MGB by CTL6 cells via TRN.

568 However, it is not clear how these random OFF cortical responses could be driven  
569 under the control of CTL6 cells. Given that intertrial variability of sensory-evoked cortical  
570 responses could be dependent on the state of intrinsic cortical activity which is in turn  
571 stochastic in nature (4, 10, 64, 65), the oscillation of the spontaneous activity of the CTL6,  
572 one second before the stimulus onset, was examined to determine if it can be used to  
573 build a classifier that predicts the cortical responses (ON vs OFF). Initially, a time period  
574 of one second before the stimulus onset was taken from the time trace of membrane  
575 potential recording of CTL6 cells during ON vs OFF cortical responses (Figure S7B).  
576 These time periods were used to encode and train the classifier, then other time periods  
577 were used for testing (See methods). Table S1 shows the results computed using the  
578 proposed classification method on the considered dataset, and the confusion matrix  
579 showed the results obtained from the classifier (Figure S7C). Interestingly, the one  
580 second pre-stimulus activity of CTL6 cells ( $\leq 50$  Hz frequency) was 63.06% accurate to  
581 predict the cortical response (ON vs OFF). Such prediction was significantly higher than  
582 the baseline accuracy (55.09%) (Figure S7F). The proposed method was able to provide  
583 a better classification than the majority classifier (9% above baseline prediction). These  
584 data suggest that the oscillation of CTL6 cells could modulate MGB activity to gate the  
585 flow of the sensory information to control the cortical sensory gain. To test the specificity  
586 of CTL6-TRN pathway to modulate MGB activity, a negative control experiment was done  
587 by inhibiting L5 cells that do not have any projections to TRN (66). The injection of the AC  
588 of RPB4-Cre neonatal mice with Ha-AAV1 virus resulted in a successful Cre-dependent  
589 expression of eNpHR3.0 receptors in L5 cells as indicated by YFP tag (Figure S8B).  
590 Consistent with the previous data, the photoinhibition of L5 cells expressing eNpHR3.0  
591 receptors by full field illumination of 565 nm light could not retrieve the missing cortical  
592 responses indicated by no recovery of the post-stimulus LFP signals from L3/4 compared  
593 to control (No light) (Figure S8B and C), which implicated that the OFF cortical responses  
594 were specifically driven by MGB inhibition through CTL6-TRN pathway.

595

### 596 **Synchronized MGB cells are associated with ON-cortical responses.**

597 Since MGB was always activated following each trial of IC stimulation, how could  
598 inhibition modulate its activity? To answer this question, we hypothesized that despite the  
599 evoked thalamic activity, thalamic cells can only evoke a cortical response under a  
600 prerequisite spatial, temporal, or spatiotemporal coordination. To test this hypothesis, Ca  
601 signals of MGB cells were imaged following the stimulation of the IC to examine if there  
602 was a change in the spatial and/or temporal activation of MGB cells during ON vs OFF  
603 cortical response (Figure 5A). Our data showed that the evoked Ca signals demonstrated  
604 three categories of activated thalamic cells. The first and second categories (Cat. #1 and  
605 2) represented thalamic cells that were exclusively activated during ON or OFF cortical  
606 responses (Figure 5B, green dots for ON and red dots for OFF). However, the last  
607 category represented the thalamic cells that were activated during ON and OFF cortical

608 responses without preference, so they had no spatial difference (Figure 5B, yellow dots).  
609 Further, the variance of the peak latencies of the evoked Ca signals from all thalamic cells  
610 in the three categories was calculated to examine the temporal difference between cells.  
611 Interestingly, Cat# 1 and 2, which were spatially different, showed no difference in the  
612 variance of the peak latencies of their evoked Ca signals, which indicated no temporal  
613 difference (Figure 5C). In contrast, category 3 MGB cells showed a higher variance of  
614 their peak latency during OFF cortical response (Figure 5E and F), which suggested that  
615 this population of MGB cells had unsynchronized activation during OFF cortical  
616 responses. To visually indicate this temporal difference in the activation of category 3  
617 MGB cells during ON vs OFF, the histogram demonstrated that there were more  
618 synchronized MGB cells during ON cortical response indicated by the small deviation of  
619 the peak latency of their Ca signals around the mean (Figure 5G, green arrow), while the  
620 activated MGB cells during OFF cortical responses had an increased spread (Figure 5G,  
621 red arrows). These data suggest that synchronous thalamic relay cell activity is required  
622 to evoke a cortical ON response, as has previously been suggested (67).

623

### 624 **Discussion:**

625 We observed stochastic population cortical responses in the mouse AC following  
626 exposure to pure tones *in-vivo* or electrical stimulation of the IC *in vitro*. Population ON  
627 responses were associated with preceding oscillations in layer 6 corticothalamic neurons  
628 and with synchronized responses among MGB cells. Population OFF responses were  
629 associated with TRN-mediated inhibition at the level of the MGB, under the control of  
630 layer 6 corticothalamic projections. Other inhibitory projections to the MGB from the IC  
631 had no impact on the probability of eliciting an ON response. Below, we discuss these  
632 data in the context of sensory processing in thalamocortical systems.

633 During ON cortical responses, the TC afferents evoked an UP state in L3/4 consistent  
634 with that shown in murine TC brain slice (34). These TC evoked UP states resembled the  
635 cortical UP states reported *in vivo* and *in vitro* initiated spontaneously by intracortical  
636 networks (15, 68, 69) or by TC inputs (2, 56). Given that the UP states evoked  
637 spontaneously and by TC inputs shared the defined temporal sequence, MacLean *et al.*  
638 (2) suggested that the predefined cortical circuits may govern and dominate the TC inputs  
639 as described previously (9). Supporting this idea, the OFF cortical responses were  
640 observed in the AC despite the activation of IC, MGB, and TRN following IC stimulation,  
641 contradicting expectations of a linear filter model that cortex should respond as long as  
642 MGB linearly transmits information upon its activation. Also, OFF cortical responses were  
643 not a sign of cortical adaptation which is characterized by gradual decrease of the  
644 response due to the repeated presentation of the stimulus (70, 71). Previous work has  
645 shown that sensory-evoked cortical variability was predictable based on the magnitude  
646 and the phase of pre-stimulus ongoing cortical oscillations (72, 73). Such a relationship  
647 means that the state of the cortical network could shape the sensory-evoked cortical  
648 responses. In fact, CT axons are about 10:1 greater than TC ones (74, 75) and more than  
649 40% of the synapses thalamic cells are formed by CT projections (76-78), which suggests  
650 that cortex has a strong influence on thalamic activities. In fact, upon activation by CTL6,  
651 TRN was reported to send inhibitory inputs to thalamic relay cells that could modulate  
652 thalamic activity (63, 79-81). Interestingly, the photo-stimulation of cortical L6 was  
653 reported to reduce the visually evoked activity in LGN relay neurons (25). Consistent with

654 that finding, our data demonstrated that both photo-inhibition of CTL6 cells and blockade  
655 of TRN activity were able to retrieve the missing cortical responses, thus implicating di-  
656 synaptic feedback inhibition of MGB by CTL6 cells was the main control point of the OFF  
657 cortical responses. MGB inhibition induced by the TRN could modulate the  
658 spatiotemporal coordination between thalamic cells due to the heterogeneity of TRN cells  
659 for their intrinsic properties and their axonal arbor size (82, 83), which supported our  
660 finding that there was a specific spatiotemporal coordination between MGB cells  
661 exclusively during ON vs OFF cortical responses (Figure 5).

662 In addition to the indirect inhibitory projections to MGB from CTL6 via TRN, there are  
663 also direct excitatory projections from CTL6 cells to MGB (59, 84-86). In the TC  
664 somatosensory slice, CTL6 cells can bidirectionally switch their excitability to favor the  
665 activation or the suppression of the somatosensory thalamus depending on the oscillation  
666 of their evoked activity (63). *In-vivo* whole cell recording of L2/3 cells in V1 showed that  
667 the visually evoked 3-5 Hz membrane potential reduces the responsiveness of the visual  
668 cortex (87), which suggests that the internal dynamics of cortical CTL6 cells could alter  
669 evoked cortical activity. OFF cortical responses in the current study always occurred after  
670 a single or multiple IC stimulation, which could suggest that OFF cortical responses  
671 occurred only after evoked cortical activity that could change the internal dynamics of the  
672 cortical cells.

673

#### 674 **Experimental considerations.**

675 Since the *in vivo* experiments were done here on anesthetized mice, it is not known  
676 whether ON- or OFF- responses would correlate to behavioral responses in an awake  
677 animal. However, the presence of ON- and OFF-responses in an anesthetized animal  
678 does not exclude them as a potential substrate for perception, since the anesthesia may  
679 prevent behavioral responses through other mechanisms (just as sensory cortical  
680 responses are preserved during sleep (88, 89)). In addition, intertrial variability of sensory-  
681 evoked cortical responses has been observed in awake and anaesthetized animals (73,  
682 90, 91). Further, in the auditory system, it was found that primary AC individual cells  
683 maintained the strengths of their evoked activity to pure tones in both awake and  
684 ketamine/xylazine anesthetized conditions (92). Forthcoming work will determine the  
685 relationship between ON- and OFF- cortical responses and conscious perception of  
686 threshold stimuli or stimuli in noise.

687

#### 688 **Implications.**

689 Previous studies viewed the thalamus and cortex as a series of filters whereby  
690 combinations of receptive fields produce increasingly selective feature detectors,  
691 culminating in uniquely selective neurons (i.e., “grandmother cells”). This type of  
692 organization implies that moment-to-moment perception is a reflection of detailed streams  
693 of information coursing through ascending sensory systems, to be consciously perceived  
694 when those streams engage highly selective cells in the cortex. An alternative view is that  
695 ascending information is used to create and modify a bank of sensory representations  
696 that get called upon depending on behavioral needs, and that conscious perception  
697 reflects activation of these pre-wired circuits. The former theory views the thalamocortical  
698 synapse as a unit of perception, while the latter views this synapse as a unit of learning.



699 A growing body of literature supports the notion that conscious perception involves  
700 the release of stereotyped patterns of cortical activity. Cortical circuits undergo  
701 spontaneous activity that is thought to be the substrate for ongoing thought, memories,  
702 and dreams (11, 12, 16, 17). Sensory inputs appear to engage the same cortical patterns  
703 (2-5), suggesting that the role of thalamocortical transmission is to activate cortical  
704 ensembles rather than impress sensory information upon them. This view comports with  
705 the finding that loss of afferent input, or increased uncertainty about afferent input, leads  
706 to untethering of the cortex and subsequent spontaneous patterns of sensory cortical  
707 activity (i.e., hallucinations). (93).

708 Critical for any such mechanism of control of cortical ensembles is a means by which  
709 those ensembles are selected. The current data suggest that the TRN, under the control  
710 of layer 6 corticothalamic projections, activates populations of thalamic neurons by  
711 synchronizing their responses, increasing the likelihood of engendering a population  
712 cortical response. This mechanism of TRN-based thalamic synchrony to activate the  
713 cortex has been proposed previously (94) and is consistent with the finding that  
714 populations of thalamic neurons are required to optimally activate the cortex (67) and that  
715 the TRN is at the heart of a prefrontal cortex-based mechanism to shape cortical  
716 activation under changing cognitive demands (95-97). Further, the TRN receives inputs  
717 from basal forebrain, amygdala and non-reciprocally linked regions of the thalamus (98-  
718 105), forming an assortment of inputs to potentially modulate TRN, and ultimately select  
719 cortical circuits. Given the putative role of the TRN in the selection of thalamic, and  
720 therefore cortical, circuits during sensory perception, one would predict that disruption of  
721 TRN activity could lead to uncontrolled release of patterns of cortical activity. Consistent  
722 with this idea, ample evidence has accumulated to suggest that schizophrenia, a disease  
723 characterized by the presence of auditory hallucinations, involves disruption of the TRN  
724 (106-115).

725  
726 **Conclusion:**

727 Here, we described a unique stimulus-evoked population cortical all-or-none response,  
728 which suggests that thalamus recruits cortical ensembles of a pre-wired sensory  
729 representations upon external stimulation and internal cortical dynamics of  
730 corticothalamic neurons. These data also suggest that corticothalamic modulators control  
731 the spatiotemporal coordination between the thalamic cells to gate the thalamic ability to  
732 activate the intracortical network. It will be important in future studies to more fully  
733 understand how other regulators of the TRN, such as the basal forebrain, prefrontal cortex  
734 and amygdala, influence the selection of cortical circuits during behavior.

735  
736

737 **Figure Legends:**

738 **Figure 1: Stochastic auditory cortical population responses to the repeated sound**  
739 **presentations *in-vivo***, A) A cartoon image showing the experimental design of  
740 simultaneous transcranial Ca imaging of the left AC of GCaMP6s mouse following playing  
741 a pure tone sound at the right ear, B) MATLAB created pseudo-color image representing  
742 the average map of AC activation indicated by  $\Delta f/f$  of sound-evoked calcium signals  
743 following 10 trials of plying 5kHz, 37 dB SPL pure tone, C) A plot graph of  $\Delta f/f$  of the  
744 sound-evoked Ca signals of A1 across 40 trials of plying 5kHz, 37 dB SPL pure tone, D)  
745 A histogram of the  $\Delta f/f$  obtained from C, E) A line plot graph of bimodal distribution of two  
746 clusters of A1 responses (responsive vs unresponsive A1) [ $R^2 = 90.8$ , ANOVA,  $f(5,11) =$   
747  $11.37$ ,  $p=0.0087$ ], A1: Primary cortex, A2: Secondary cortex, AAF: Anterior auditory filed,  
748 D: Dorsal, R: Rostral.

749  
750 **Figure 2: Stochastic auditory cortical responses to the repeated sound**  
751 **presentations *in-vitro***: A-B) Ai and Bi: Cartoon images showing the experimental design  
752 of simultaneous FA or Ca imaging, respectively, and the IC stimulation of the aCTC slice,  
753 Aii and Bii: MATLAB pseudo-color images showing the neuronal activation indicated by  
754 evoked FA or Ca signals, respectively, in the IC, MGB, TRN and AC following the IC  
755 stimulation, Aiii and Biii: The time series of  $\Delta f/f$  of evoked FA or Ca signals, respectively,  
756 in the IC, MGB, TRN and AC following the IC stimulation, C) The time series of evoked  
757 Ca signals of some activated L4 cells following the IC stimulation, D) Di and Ei: Cartoon  
758 images showing the experimental design of the simultaneous FA imaging and whole cell  
759 recording of L4 cells or LFP recording of layer 3/4, respectively, Dii and Diii: The time  
760 series of L4 whole cell recording and the  $\Delta f/f$  of the evoked cortical FA signals,  
761 respectively, following the IC stimulation, Eii and Eiii: The time series of the L3/4 LFP  
762 signals and  $\Delta f/f$  of the evoked cortical FA signals, respectively, following the IC  
763 stimulation, red box: The magnification of the post-stimulus activity of L4 cells showing  
764 evoked upstate associated with action potentials, green box: The magnification of some  
765 post-stimulus cortical LFP signals showing UP state evoked activity, red Xs refer to the  
766 occurrence of OFF cortical responses indicated by the absence of cortical FA or Ca  
767 signals as well as post-stimulus cortical LFP signals, blue lines indicate the onset of the  
768 IC stimulation, Yellow circle indicates the position of the electrical stimulation of the IC,  
769

770 **Figure 3: The OFF cortical responses are driven by MGB inhibition.** A) Ai: A cartoon  
771 image showing the experimental design of simultaneous FA imaging and IC stimulation,  
772 Aii-Aiv: The time series of  $\Delta f/f$  of the evoked cortical FA signals in the IC (black trace),  
773 MGB (orange trace), and AC (brown trace) following the stimulation of the IC under ACSF  
774 (control), (gabazine), or washing by ACSF (Wash), respectively, Av: A plot graph of the  
775 results of repeated measures one-way ANOVA showing that the probability of ON cortical  
776 responses was significantly higher than that of control and wash [\*\*\*\*  $f(1,12) = 731.16$ ,  $p$   
777  $< 10^{-9}$ ,  $p = 3.3 \times 10^{-6}$  for control vs gabazine,  $p = 0.027$  for control vs wash,  $p < 10^{-9}$  for  
778 gabazine vs wash], B) Bi: A cartoon image showing the experimental design of  
779 simultaneous FA imaging, IC stimulation, and IPSCs or EPSCs recording from L4 or MGB  
780 cells, Bii-Biii: Evoked post-stimulus IPSCs recorded from L4 or MGB cell, respectively,  
781 Biv-Bv: The time series of  $\Delta f/f$  of the evoked cortical FA signals simultaneously imaged  
782 during IPSCs recording from L4 or MGB cell, respectively, red box and green box: The

783 magnification of the evoked post-stimulus IPSCs recorded from L4 or MGB cell,  
784 respectively, C) Ci-Cii: Evoked post-stimulus IPSCs or EPSCs, respectively, recorded  
785 from MGB cell during ON vs OFF cortical events, Ciii: A scatter plot graph of the area  
786 under the curve (AUC) of the evoked post-stimulus IPSCs and EPSCs recorded during  
787 OFF cortical responses normalized against those recorded during ON cortical events  
788 showing that MGB cells received more inhibitory charges during OFF cortical events with  
789 no change in the received excitatory charges [paired t-test: for EPSCs,  $*t(13) = 0.26$ ,  $p =$   
790  $0.8$ , for IPSCs,  $t(18) = -2.18$ ,  $p = 0.042$ ], D) Di: A cartoon image showing the experimental  
791 design of simultaneous FA imaging, IC stimulation, and selective gabazine injection into  
792 MGB or AC using picospritzer, Dii: The time series of  $\Delta f/f$  of the evoked cortical FA signals  
793 during the injection of ACSF (control, top black trace), gabazine into MGB (orange trace),  
794 gabazine into AC (brown trace), or after washing (middle green trace), Diii: A bar graph  
795 of repeated measures one way ANOVA results showing that the probability of ON cortical  
796 responses were significantly higher after the injection of gabazine into MGB [ $*f(1,3) =$   
797  $35.76$ ,  $p = 0.009$ ,  $p = 0.01$  for control vs gabazine into MGB,  $p = 1$  for control vs gabazine  
798 into AC,  $p = 1$  for control vs wash,  $p = 0.016$  for gabazine into MGB vs gabazine into AC,  
799  $p = 0.009$  for gabazine into MGB vs wash,  $p = 1$  for gabazine into AC vs wash], red Xs  
800 refer to the occurrence of OFF cortical responses indicated by the absence of cortical FA  
801 or Ca signals as well as post-stimulus cortical LFP signals, blue lines indicate the onset  
802 of the IC stimulation, AC: IPSCs: Inhibitory postsynaptic currents, EPSCs: Excitatory  
803 postsynaptic currents.

804  
805 **Figure 4: The OFF cortical responses were driven by the feedback inhibition of**  
806 **MGB by CT-L6-TRN pathway:** A) Ai: A cartoon image showing the experimental design  
807 of simultaneous IC stimulation, LFP recording, and full field photoinhibition, Aii: Image of  
808 aCTC slice of NTSR1-Cre mouse showing the expression of eNpHR3.0 receptors as  
809 indicated by YFP tag in NTSR1 +ve CTL6 cells as well as their projections to TRN and  
810 MGB, Aiii: The time series of the post stimulus cortical LFP signals from L3/4 following  
811 the IC stimulation without (top) and with 565 nm light (bottom), Aiv: A scatter plot graph  
812 of paired t-test showing that the probability of ON cortical events was higher during the  
813 photoinhibition of CTL6 cells by 565 nm light [paired t-test,  $****t(15) = -7.06$ ,  $p = 3.8 \times 10^{-6}$ ],  
814 B) Bi: A cartoon image showing the experimental design of simultaneous IC  
815 stimulation, FA imaging and NBQX injection into TRN by Picospritzing, Bii: The time  
816 series of  $\Delta f/f$  of the evoked cortical FA signals during ACSF (black trace) and NBQX  
817 (brown trace) injections into TRN as well as washing (green trace), right panel, Biii: A plot  
818 graph of paired t-test showing that the probability of ON cortical events was higher by  
819 blocking TRN activity by NBQX compared to the control [paired t-test,  $***t(5) = -6.03$ ,  $p =$   
820  $5.2 \times 10^{-4}$ ], red Xs refer to the occurrence of OFF cortical responses indicated by the  
821 absence of the post-stimulus LFP signals recorded from L3/4 or  $\Delta f/f$  of the evoked cortical  
822 FA signals, orange lines indicate the time period of illuminating the light, blue lines indicate  
823 the onset of the IC stimulation.

824  
825 **Figure 5: Unsynchronized MGB cellular activity is associated with OFF-cortical**  
826 **responses.** A) A cartoon image showing the experimental design of simultaneous IC  
827 stimulation, Ca imaging of MGB cells, and cortical LFP recording, B) A cartoon image  
828 showing the locations of the activated thalamic cell, indicated by evoked Ca signals

829 following IC stimulation, during ON only (green circles), OFF only (red circles), and during  
830 both (yellow circles), C) A scatter plot graph of the paired t-test showing no change  
831 between the variances of peak latencies of cat.#1 and 2, [ $t(4) = -0.41$ ,  $p = 0.71$ ], D) A  
832 histogram of the deviations of peak latencies from their mean of the Ca signals of Cat.#1  
833 cells (green bars and line) vs Cat.#2 cells (Red bars and line), E) The sweeps of the  
834 evoked Ca signals of all activated cells during ON (top) vs OFF (bottom) cortical  
835 responses indicated by the post stimulus cortical LFP signals recorded from L3/4, F) A  
836 scatter plot graph of the paired t-test showing a higher variance of the peak latencies of  
837 Cat.#3 cells activated during OFF cortical response compared to those activated during  
838 ON cortical responses [ $t(4) = -3.56$ ,  $p = 0.024$ ], F) A histogram of the deviations of the  
839 peak latencies from their mean of the Ca signals of Cat.#3 cells activated during ON  
840 (yellow bars and green line) vs OFF cortical responses (yellow bars and red lines).

841  
842 **Figure 1S: Slicing steps of aCTC mouse brain slice:** 1) The brain was cut from its  
843 olfactory bulb as 2mm to the caudal axis to make the first platform, 2) The brain was lifted  
844 on its frontal aspect on the cut surface made by step 1, then rotated 17-20° angle relative  
845 to the brain's midline, 3) From the dorsal view, the brain was then cut at 60° angle relative  
846 to the base and perpendicular on the horizontal line to make the second platform, 4) The  
847 brain was lifted on the cut surface made by step 4 on vibratome's stage and cut as 600  
848 um slices, 5) The final look of aCTC slice should have IC, MGB, and AC connected  
849 together at one spatial plan, AC: Auditory cortex, C: Caudal, FA: Flavoprotein, IC: Inferior  
850 colliculus, L: Lateral, LGN: Lateral geniculate nucleus, M, Medial.

851  
852 **Figure 2S: Procedures and output of brain network analysis:** Cartoon images  
853 showing the procedures followed to run the brain network analysis on the FA imaging  
854 data obtained from AC, MGB, TRN, and IC of aCTC slice following the IC stimulation A)  
855 Proposed architecture for brain network representation learning, B) Time series shows  
856 the extraction of pixel values from the cortex images along the time axis followed by  
857 correlation network construction from time series. Each pixel is represented by a different  
858 color, C) Exemplary showing the sequence extraction from brain networks, D) The steps  
859 of sequence-to-sequence autoencoder, E) Examples of the correlation networks  
860 constructed from our data for activated areas of the brain structures, the blue points are  
861 the network's nodes, Yellow circle: The site of the electric stimulation.

862  
863 **Figure S3:** A) Ai and Aii: The time series of the  $\Delta f/f$  of the evoked FA signals of AC, MGB,  
864 and IC following stimulating the IC with 200 or 100  $\mu\text{A}$  electric current, respectively, with  
865 the same ISI as 10 seconds, B) Bi and Bii: The time series of the  $\Delta f/f$  of the evoked FA  
866 signals of AC, MGB, and IC following stimulating the IC with 150  $\mu\text{A}$  electric current with  
867 ISI = 20 or 10 seconds, respectively, C) Ci-Ciii: MATLAB pseudo-color images of the  
868 evoked FA signals in aCTC slice after the electric stimulation of IC, MGB, or the  
869 subcortical white matter, respectively, Civ-vi: The time series of  $\Delta f/f$  of the evoked FA  
870 signals in AC, MGB, and IC following the electric stimulation of IC, MGB, or subcortical  
871 white matter, red Xs refer to the occurrence of OFF cortical responses indicated by the  
872 absence of cortical FA, blue lines indicate the onset of the IC stimulation, yellow circles  
873 indicate the position of the electrical stimulation, ISI: Inter-stimulus interval, sWM:  
874 Subcortical white matter.

875

876 **Figure S4:** LFP signals recorded from cortical L3/4 after 10 trials of IC stimulation in a  
877 different laboratory environment (Matthew Banks laboratory, University of Wisconsin)  
878 using isoflurane anesthesia and no transcardiac perfusion, and still showing the binary  
879 cortical responses (ON vs OFF).

880

881 **Figure S5: The OFF cortical responses were not driven by the feedforward**  
882 **inhibition of MGB by the GABAergic cells of the IC:** A) Image of aCTC slice from  
883 GAD2-Cre mouse showing the Cre-dependent expression of halorhodopsin indicated by  
884 YFP tag in GABAergic cells of the IC as well as their projections to MGB, B) The time  
885 series of the post stimulus cortical LFP signals from L3/4 following the IC stimulation  
886 without (top) and with 565 nm light (bottom), C) A scatter plot of paired t-test showing no  
887 change in the probability of ON cortical responses after the photoinhibition of GABAergic  
888 cells by light, red Xs refer to the occurrence of OFF cortical responses indicated by the  
889 absence of post-stimulus cortical LFP signals from L3/4, orange lines indicate the time  
890 period of illuminating the light.

891

892 **Figure S6: Chemical inhibition of CT-L6 cells retrieved the missing cortical**  
893 **responses.** A) Image of aCTC slice of NTSR1-Cre mouse showing the expression of  
894 hM4Di receptors as indicated by m-cherry tag in NTSR1 +ve CTL6 cells as well as their  
895 projections to TRN and MGB, B) The time series of  $\Delta f/f$  of the evoked cortical FA signals  
896 during the perfusion of ACSF (black trace) and CNO (brown trace) then washing (green  
897 trace), C) A scatter plot graph of the paired t-test showing that the probability of ON  
898 cortical events was higher during the chemical inhibition of CTL6 cells by CNO compared  
899 to the control [ $*t(3)=-3.66$ ,  $p=0.035$ ], CNO: Clozapine-n-oxide.

900

901 **Figure S7: The oscillation of the pre-stimulus activity of CTL6 is a good predictor**  
902 **for the cortical response.** A) A cartoon image showing the experimental design of  
903 simultaneous IC stimulation, FA imaging and whole cell recording from CT-L6 cells, B)  
904 Examples of multiple sweeps showing the pre-stimulus activity of CT-L6 cells during ON  
905 (left) vs OFF (right) cortical responses, green and red boxes assign the time period of one  
906 second before the stimulus onset that was taken for analysis under ON or OFF cortical  
907 responses, respectively, C) A confusion matrix showing the predicted ON vs OFF  
908 responses by the classifier against the real ON vs OFF, D) F1 score for the ON class of  
909 the classification compared to the majority classifier, represented with the orange point,  
910 E) F1 score for the OFF class of the classification compared to the majority classifier,  
911 represented with the orange point, F) Accuracy of the classification compared to the  
912 majority classifier, represented with the orange point, Blue points are the outliers of the  
913 result distribution, blue points are the outliers of the result distribution.

914

915 **Figure S8: Photoinhibition of CT-L5 cells has no effect on the binary cortical**  
916 **response:** A) A cartoon image showing the experimental design of simultaneous IC  
917 stimulation, LFP recording, and full field photoinhibition, B) Image of aCTC slice of RPB4-  
918 Cre mouse showing the expression of eNpHR3.0 receptors as indicated by YFP tag in  
919 RBP4 +ve L5 cells, C) The time series of the post stimulus cortical LFP signals from L3/4  
920 following the IC stimulation without (top) and with 565 nm light (bottom), D) A scatter plot

921 graph of paired t-test showing no difference in the probability of ON cortical responses  
922 during light or no light [paired t-test,  $t(37) = 0.46$ ,  $p = 0.18$ ], red Xs refer to the occurrence  
923 of OFF cortical responses indicated by the absence of the post-stimulus LFP signals  
924 recorded from L3/4, orange lines indicate the time period of light illumination.  
925  
926  
927

928 **References:**

- 929 1. D. H. HUBEL, T. N. WIESEL, Receptive fields of single neurones in the cat's  
930 striate cortex. *J Physiol* **148**, 574-591 (1959).
- 931 2. J. N. MacLean, B. O. Watson, G. B. Aaron, R. Yuste, Internal dynamics  
932 determine the cortical response to thalamic stimulation. *Neuron* **48**, 811-823  
933 (2005).
- 934 3. J. E. Miller, I. Ayzenshtat, L. Carrillo-Reid, R. Yuste, Visual stimuli recruit  
935 intrinsically generated cortical ensembles. *Proc Natl Acad Sci U S A* **111**, E4053-  
936 4061 (2014).
- 937 4. T. Kenet, D. Bibitchkov, M. Tsodyks, A. Grinvald, A. Arieli, Spontaneously  
938 emerging cortical representations of visual attributes. *Nature* **425**, 954-956  
939 (2003).
- 940 5. S. Sakata, K. D. Harris, Laminar structure of spontaneous and sensory-evoked  
941 population activity in auditory cortex. *Neuron* **64**, 404-418 (2009).
- 942 6. R. Jardri, D. Pins, C. Delmaire, J. L. Goeb, P. Thomas, Activation of bilateral  
943 auditory cortex during verbal hallucinations in a child with schizophrenia. *Mol*  
944 *Psychiatry* **12**, 319 (2007).
- 945 7. S. S. Shergill, M. J. Brammer, S. C. Williams, R. M. Murray, P. K. McGuire,  
946 Mapping auditory hallucinations in schizophrenia using functional magnetic  
947 resonance imaging. *Arch Gen Psychiatry* **57**, 1033-1038 (2000).
- 948 8. J. Voisin, A. Bidet-Caulet, O. Bertrand, P. Fonlupt, Listening in silence activates  
949 auditory areas: a functional magnetic resonance imaging study. *J Neurosci* **26**,  
950 273-278 (2006).
- 951 9. C. C. Petersen, Evoking spontaneous activity. *Neuron* **48**, 710-711 (2005).
- 952 10. B. Q. Mao, F. Hamzei-Sichani, D. Aronov, R. C. Froemke, R. Yuste, Dynamics of  
953 spontaneous activity in neocortical slices. *Neuron* **32**, 883-898 (2001).
- 954 11. M. V. Sanchez-Vives, D. A. McCormick, Cellular and network mechanisms of  
955 rhythmic recurrent activity in neocortex. *Nat Neurosci* **3**, 1027-1034 (2000).
- 956 12. I. Timofeev, F. Grenier, M. Bazhenov, T. J. Sejnowski, M. Steriade, Origin of slow  
957 cortical oscillations in deafferented cortical slabs. *Cereb Cortex* **10**, 1185-1199  
958 (2000).
- 959 13. U. A. Ernst, K. R. Pawelzik, C. Sahar-Pikielny, M. V. Tsodyks, Intracortical origin  
960 of visual maps. *Nat Neurosci* **4**, 431-436 (2001).
- 961 14. R. Cossart, D. Aronov, R. Yuste, Attractor dynamics of network UP states in the  
962 neocortex. *Nature* **423**, 283-288 (2003).
- 963 15. Y. Shu, A. Hasenstaub, D. A. McCormick, Turning on and off recurrent balanced  
964 cortical activity. *Nature* **423**, 288-293 (2003).
- 965 16. D. Takeuchi, T. Hirabayashi, K. Tamura, Y. Miyashita, Reversal of interlaminar  
966 signal between sensory and memory processing in monkey temporal cortex.  
967 *Science* **331**, 1443-1447 (2011).
- 968 17. Y. Nir, G. Tononi, Dreaming and the brain: from phenomenology to  
969 neurophysiology. *Trends Cogn Sci* **14**, 88-100 (2010).
- 970 18. P. J. Uhlhaas *et al.*, Neural synchrony in cortical networks: history, concept and  
971 current status. *Front Integr Neurosci* **3**, 17 (2009).
- 972 19. G. Buzsáki, Neural syntax: cell assemblies, synapsembles, and readers. *Neuron*  
973 **68**, 362-385 (2010).

- 974 20. Yudintsev, L. C. M. G., Asilador A. and Llano D.A. (Neuromethods, 2019).  
975 21. Huynh, L. C. M. N, Ibrahim B.A., Key M.N. and Llano D.A. (Neuromethods,  
976 2019).  
977 22. D. S. Bortone, S. R. Olsen, M. Scanziani, Translaminar inhibitory cells recruited  
978 by layer 6 corticothalamic neurons suppress visual cortex. *Neuron* **82**, 474-485  
979 (2014).  
980 23. J. Kim, C. J. Matney, A. Blankenship, S. Hestrin, S. P. Brown, Layer 6  
981 corticothalamic neurons activate a cortical output layer, layer 5a. *J Neurosci* **34**,  
982 9656-9664 (2014).  
983 24. R. A. Mease, P. Krieger, A. Groh, Cortical control of adaptation and sensory relay  
984 mode in the thalamus. *Proc Natl Acad Sci U S A* **111**, 6798-6803 (2014).  
985 25. S. R. Olsen, D. S. Bortone, H. Adesnik, M. Scanziani, Gain control by layer six in  
986 cortical circuits of vision. *Nature* **483**, 47-52 (2012).  
987 26. M. Jeong *et al.*, Comparative three-dimensional connectome map of motor  
988 cortical projections in the mouse brain. *Sci Rep* **6**, 20072 (2016).  
989 27. E. Grant, A. Hoerder-Suabedissen, Z. Molnár, The Regulation of Corticofugal  
990 Fiber Targeting by Retinal Inputs. *Cereb Cortex* **26**, 1336-1348 (2016).  
991 28. H. Taniguchi *et al.*, A resource of Cre driver lines for genetic targeting of  
992 GABAergic neurons in cerebral cortex. *Neuron* **71**, 995-1013 (2011).  
993 29. S. Lammel *et al.*, Diversity of transgenic mouse models for selective targeting of  
994 midbrain dopamine neurons. *Neuron* **85**, 429-438 (2015).  
995 30. C. A. Villalobos, Q. Wu, P. H. Lee, P. J. May, M. A. Basso, Parvalbumin and  
996 GABA Microcircuits in the Mouse Superior Colliculus. *Front Neural Circuits* **12**,  
997 35 (2018).  
998 31. B. A. Ibrahim *et al.*, Effect of temperature on FAD and NADH-derived signals and  
999 neurometabolic coupling in the mouse auditory and motor cortex. *Pflugers Arch*  
1000 **469**, 1631-1649 (2017).  
1001 32. B. J. Slater, A. Y. Fan, K. A. Stebbings, M. T. Saif, D. A. Llano, Modification of a  
1002 Colliculo-thalamocortical Mouse Brain Slice, Incorporating 3-D printing of  
1003 Chamber Components and Multi-scale Optical Imaging. *J Vis Exp*, (2015).  
1004 33. D. A. Llano, B. J. Slater, A. M. Lesicko, K. A. Stebbings, An auditory  
1005 colliculothalamocortical brain slice preparation in mouse. *J Neurophysiol* **111**,  
1006 197-207 (2014).  
1007 34. B. M. Krause, A. Raz, D. J. Uhlrich, P. H. Smith, M. I. Banks, Spiking in auditory  
1008 cortex following thalamic stimulation is dominated by cortical network activity.  
1009 *Front Syst Neurosci* **8**, 170 (2014).  
1010 35. A. Yaron-Jakoubovitch, C. Koch, I. Segev, Y. Yarom, The unimodal distribution of  
1011 sub-threshold, ongoing activity in cortical networks. *Front Neural Circuits* **7**, 116  
1012 (2013).  
1013 36. Y. G. Sun *et al.*, Biphasic cholinergic synaptic transmission controls action  
1014 potential activity in thalamic reticular nucleus neurons. *J Neurosci* **33**, 2048-2059  
1015 (2013).  
1016 37. S. H. Lee, G. Govindaiah, C. L. Cox, Selective excitatory actions of DNQX and  
1017 CNQX in rat thalamic neurons. *J Neurophysiol* **103**, 1728-1734 (2010).  
1018 38. B. L. Roth, DREADDs for Neuroscientists. *Neuron* **89**, 683-694 (2016).



- 1019 39. U. Di Fabrizio, University of Illinois at Chicago, UIC Dissertations and  
1020 Theses (2017).
- 1021 40. I. G. a. Y. B. a. A. Courville, *Deep Learning*. (MIT Press, 2016).
- 1022 41. K. G. a. T. A. Taheri, Berger-Wolf, paper presented at the KDD'18 Deep Learning  
1023 Day, London, UK, 2018.
- 1024 42. S. H. a. J. Schmidhuber, Long Short-term Memory. *Neural Computation* **9**, 1735-  
1025 1780 (1997).
- 1026 43. M.-T. L. Jiwei Li , Dan Jurafsky. (arXiv at Cornell University 2015), pp. 10.
- 1027 44. O. V. a. Q. I. Sutskever, V. Le, in *NIPS'14 Proceedings of the 27th International  
1028 Conference on Neural Information Processing Systems*. (MIT  
1029 Press Cambridge, MA , USA, Montreal, Canada, 2014), vol. 2, pp. 3104-3112.
- 1030 45. C. C. a. C. Lin, LIBSVM: A library for support vector machines. *ACM  
1031 Transactions on Intelligent Systems and Technology* **2**, (2007).
- 1032 46. M., N. B. Christ, J. Neuffer and A. W. Kempa-Liehr, Time Series FeatuRe  
1033 Extraction on basis of scalable hypothesis tests (tsfresh--A Python package).  
1034 *Neurocomputing* **307**, 72-77 (2018).
- 1035 47. W., V. Drongelen. (Academic press, 2018), pp. 103-118.
- 1036 48. I., G. a. A. Elisseeff, An introduction to variable and feature selection. *Journal of  
1037 machine learning research* **3**, 1157-1182 (2003).
- 1038 49. S., M. Ross. (Academic Press, 2017), pp. 425-461.
- 1039 50. A., H. S. a. P. G. Kraskov, Estimating mutual information. *Physical review E* **69**,  
1040 066138 (2004).
- 1041 51. T., C. a. C. Guestrin, in *Proceedings of the 22nd acm sigkdd international  
1042 conference on knowledge discovery and data mining*. (2016).
- 1043 52. J., H. Friedman, Greedy function approximation: a gradient boosting machine.  
1044 *Annals of statistics*, 1189-1232 (2001).
- 1045 53. R., J. E. a. G. M. Nisbet. (Academic Press, 2009).
- 1046 54. D. M. W. POWERS, EVALUATION: FROM PRECISION, RECALL AND F-  
1047 MEASURE TO ROC, INFORMEDNESS, MARKEDNESS & CORRELATION.  
1048 *Journal of Machine Learning Technologies* **2**, 37-63 (2011).
- 1049 55. J. B. Issa *et al.*, Multiscale optical Ca<sup>2+</sup> imaging of tonal organization in mouse  
1050 auditory cortex. *Neuron* **83**, 944-959 (2014).
- 1051 56. P. Rigas, M. A. Castro-Alamancos, Thalamocortical Up states: differential effects  
1052 of intrinsic and extrinsic cortical inputs on persistent activity. *J Neurosci* **27**, 4261-  
1053 4272 (2007).
- 1054 57. D. Peruzzi, E. Bartlett, P. H. Smith, D. L. Oliver, A monosynaptic GABAergic  
1055 input from the inferior colliculus to the medial geniculate body in rat. *J Neurosci*  
1056 **17**, 3766-3777 (1997).
- 1057 58. J. A. Winer, R. L. Saint Marie, D. T. Larue, D. L. Oliver, GABAergic feedforward  
1058 projections from the inferior colliculus to the medial geniculate body. *Proc Natl  
1059 Acad Sci U S A* **93**, 8005-8010 (1996).

- 1060 59. Y. W. Lam, S. M. Sherman, Functional organization of the somatosensory  
1061 cortical layer 6 feedback to the thalamus. *Cereb Cortex* **20**, 13-24 (2010).
- 1062 60. J. A. Hirsch, X. Wang, F. T. Sommer, L. M. Martinez, How inhibitory circuits in  
1063 the thalamus serve vision. *Annu Rev Neurosci* **38**, 309-329 (2015).
- 1064 61. C. Varela, Thalamic neuromodulation and its implications for executive networks.  
1065 *Front Neural Circuits* **8**, 69 (2014).
- 1066 62. W. Guo, A. R. Clause, A. Barth-Maroon, D. B. Polley, A Corticothalamic Circuit for  
1067 Dynamic Switching between Feature Detection and Discrimination. *Neuron* **95**,  
1068 180-194.e185 (2017).
- 1069 63. S. R. Crandall, S. J. Cruikshank, B. W. Connors, A corticothalamic switch:  
1070 controlling the thalamus with dynamic synapses. *Neuron* **86**, 768-782 (2015).
- 1071 64. K. L. Hoffman *et al.*, The upshot of up states in the neocortex: from slow  
1072 oscillations to memory formation. *J Neurosci* **27**, 11838-11841 (2007).
- 1073 65. M. Steriade, A. Nuñez, F. Amzica, A novel slow (< 1 Hz) oscillation of neocortical  
1074 neurons in vivo: depolarizing and hyperpolarizing components. *J Neurosci* **13**,  
1075 3252-3265 (1993).
- 1076 66. J. W. Crabtree, Functional Diversity of Thalamic Reticular Subnetworks. *Front*  
1077 *Syst Neurosci* **12**, 41 (2018).
- 1078 67. R. M. Bruno, B. Sakmann, Cortex is driven by weak but synchronously active  
1079 thalamocortical synapses. *Science* **312**, 1622-1627 (2006).
- 1080 68. J. N. Kerr, D. Greenberg, F. Helmchen, Imaging input and output of neocortical  
1081 networks in vivo. *Proc Natl Acad Sci U S A* **102**, 14063-14068 (2005).
- 1082 69. Y. Ikegaya *et al.*, Synfire chains and cortical songs: temporal modules of cortical  
1083 activity. *Science* **304**, 559-564 (2004).
- 1084 70. S. Chung, X. Li, S. B. Nelson, Short-term depression at thalamocortical synapses  
1085 contributes to rapid adaptation of cortical sensory responses in vivo. *Neuron* **34**,  
1086 437-446 (2002).
- 1087 71. J. M. Abolafia, R. Vergara, M. M. Arnold, R. Reig, M. V. Sanchez-Vives, Cortical  
1088 auditory adaptation in the awake rat and the role of potassium currents. *Cereb*  
1089 *Cortex* **21**, 977-990 (2011).
- 1090 72. A. Arieli, A. Sterkin, A. Grinvald, A. Aertsen, Dynamics of ongoing activity:  
1091 explanation of the large variability in evoked cortical responses. *Science* **273**,  
1092 1868-1871 (1996).
- 1093 73. M. Saka, J. Berwick, M. Jones, Inter-trial variability in sensory-evoked cortical  
1094 hemodynamic responses: the role of the magnitude of pre-stimulus fluctuations.  
1095 *Front Neuroenergetics* **4**, 10 (2012).
- 1096 74. M. Deschênes, P. Veinante, Z. W. Zhang, The organization of corticothalamic  
1097 projections: reciprocity versus parity. *Brain Res Brain Res Rev* **28**, 286-308  
1098 (1998).
- 1099 75. S. M. Sherman, C. Koch, The control of retinogeniculate transmission in the  
1100 mammalian lateral geniculate nucleus. *Exp Brain Res* **63**, 1-20 (1986).
- 1101 76. A. Erişir, S. C. Van Horn, S. M. Sherman, Relative numbers of cortical and  
1102 brainstem inputs to the lateral geniculate nucleus. *Proc Natl Acad Sci U S A* **94**,  
1103 1517-1520 (1997).

- 1104 77. X. B. Liu, C. N. Honda, E. G. Jones, Distribution of four types of synapse on  
1105 physiologically identified relay neurons in the ventral posterior thalamic nucleus  
1106 of the cat. *J Comp Neurol* **352**, 69-91 (1995).
- 1107 78. S. C. Van Horn, A. Erişir, S. M. Sherman, Relative distribution of synapses in the  
1108 A-laminae of the lateral geniculate nucleus of the cat. *J Comp Neurol* **416**, 509-  
1109 520 (2000).
- 1110 79. M. Steriade, D. Contreras, F. Amzica, I. Timofeev, Synchronization of fast (30-40  
1111 Hz) spontaneous oscillations in intrathalamic and thalamocortical networks. *J*  
1112 *Neurosci* **16**, 2788-2808 (1996).
- 1113 80. R. W. Guillery, J. K. Harting, Structure and connections of the thalamic reticular  
1114 nucleus: Advancing views over half a century. *J Comp Neurol* **463**, 360-371  
1115 (2003).
- 1116 81. K. McAlonan, J. Cavanaugh, R. H. Wurtz, Guarding the gateway to cortex with  
1117 attention in visual thalamus. *Nature* **456**, 391-394 (2008).
- 1118 82. S. H. Lee, G. Govindaiah, C. L. Cox, Heterogeneity of firing properties among rat  
1119 thalamic reticular nucleus neurons. *J Physiol* **582**, 195-208 (2007).
- 1120 83. D. Pinault *et al.*, Intracellular recordings in thalamic neurones during  
1121 spontaneous spike and wave discharges in rats with absence epilepsy. *J Physiol*  
1122 **509 ( Pt 2)**, 449-456 (1998).
- 1123 84. J. Bourassa, D. Pinault, M. Deschênes, Corticothalamic projections from the  
1124 cortical barrel field to the somatosensory thalamus in rats: a single-fibre study  
1125 using biocytin as an anterograde tracer. *Eur J Neurosci* **7**, 19-30 (1995).
- 1126 85. P. Golshani, X. B. Liu, E. G. Jones, Differences in quantal amplitude reflect  
1127 GluR4- subunit number at corticothalamic synapses on two populations of  
1128 thalamic neurons. *Proc Natl Acad Sci U S A* **98**, 4172-4177 (2001).
- 1129 86. H. E. Scharfman, S. M. Lu, W. Guido, P. R. Adams, S. M. Sherman, N-methyl-D-  
1130 aspartate receptors contribute to excitatory postsynaptic potentials of cat lateral  
1131 geniculate neurons recorded in thalamic slices. *Proc Natl Acad Sci U S A* **87**,  
1132 4548-4552 (1990).
- 1133 87. M. C. Einstein, P. O. Polack, D. T. Tran, P. Golshani, Visually Evoked 3-5 Hz  
1134 Membrane Potential Oscillations Reduce the Responsiveness of Visual Cortex  
1135 Neurons in Awake Behaving Mice. *J Neurosci* **37**, 5084-5098 (2017).
- 1136 88. J. J. Norton, S. Umunna, T. Bretl, The elicitation of steady-state visual evoked  
1137 potentials during sleep. *Psychophysiology* **54**, 496-507 (2017).
- 1138 89. V. Csépe, G. Karmos, M. Molnár, Evoked potential correlates of stimulus  
1139 deviance during wakefulness and sleep in cat--animal model of mismatch  
1140 negativity. *Electroencephalogr Clin Neurophysiol* **66**, 571-578 (1987).
- 1141 90. A. Ledberg, A. Montagnini, R. Coppola, S. L. Bressler, Reduced variability of  
1142 ongoing and evoked cortical activity leads to improved behavioral performance.  
1143 *PLoS One* **7**, e43166 (2012).
- 1144 91. M. R. Deweese, A. M. Zador, Shared and private variability in the auditory cortex.  
1145 *J Neurophysiol* **92**, 1840-1855 (2004).
- 1146 92. S. K. Talwar, G. L. Gerstein, Reorganization in awake rat auditory cortex by local  
1147 microstimulation and its effect on frequency-discrimination behavior. *J*  
1148 *Neurophysiol* **86**, 1555-1572 (2001).

- 1149 93. D. H. Ffytche *et al.*, The anatomy of conscious vision: an fMRI study of visual  
1150 hallucinations. *Nat Neurosci* **1**, 738-742 (1998).
- 1151 94. Y. B. Saalmann, S. Kastner, Cognitive and perceptual functions of the visual  
1152 thalamus. *Neuron* **71**, 209-223 (2011).
- 1153 95. R. D. Wimmer *et al.*, Thalamic control of sensory selection in divided attention.  
1154 *Nature* **526**, 705-709 (2015).
- 1155 96. B. Zikopoulos, H. Barbas, Prefrontal projections to the thalamic reticular nucleus  
1156 form a unique circuit for attentional mechanisms. *J Neurosci* **26**, 7348-7361  
1157 (2006).
- 1158 97. C. D. Yingling, J. E. Skinner, Regulation of unit activity in nucleus reticularis  
1159 thalami by the mesencephalic reticular formation and the frontal granular cortex.  
1160 *Electroencephalogr Clin Neurophysiol* **39**, 635-642 (1975).
- 1161 98. Y. W. Lam, S. M. Sherman, Mapping by laser photostimulation of connections  
1162 between the thalamic reticular and ventral posterior lateral nuclei in the rat. *J*  
1163 *Neurophysiol* **94**, 2472-2483 (2005).
- 1164 99. Y. W. Lam, S. M. Sherman, Functional topographic organization of the motor  
1165 reticulothalamic pathway. *J Neurophysiol* **113**, 3090-3097 (2015).
- 1166 100. J. W. Crabtree, G. L. Collingridge, J. T. Isaac, A new intrathalamic pathway  
1167 linking modality-related nuclei in the dorsal thalamus. *Nat Neurosci* **1**, 389-394  
1168 (1998).
- 1169 101. J. W. Crabtree, J. T. Isaac, New intrathalamic pathways allowing modality-related  
1170 and cross-modality switching in the dorsal thalamus. *J Neurosci* **22**, 8754-8761  
1171 (2002).
- 1172 102. S. C. Lee, S. J. Cruikshank, B. W. Connors, Electrical and chemical synapses  
1173 between relay neurons in developing thalamus. *J Physiol* **588**, 2403-2415 (2010).
- 1174 103. A. Kimura, H. Imbe, T. Donishi, Y. Tamai, Axonal projections of single auditory  
1175 neurons in the thalamic reticular nucleus: implications for tonotopy-related gating  
1176 function and cross-modal modulation. *Eur J Neurosci* **26**, 3524-3535 (2007).
- 1177 104. B. Desilets-Roy, C. Varga, P. Lavallée, M. Deschênes, Substrate for cross-talk  
1178 inhibition between thalamic barreloids. *J Neurosci* **22**, RC218 (2002).
- 1179 105. B. Zikopoulos, H. Barbas, Pathways for emotions and attention converge on the  
1180 thalamic reticular nucleus in primates. *J Neurosci* **32**, 5338-5350 (2012).
- 1181 106. F. Ferrarelli, G. Tononi, The thalamic reticular nucleus and schizophrenia.  
1182 *Schizophr Bull* **37**, 306-315 (2011).
- 1183 107. A. Young, R. D. Wimmer, Implications for the thalamic reticular nucleus in  
1184 impaired attention and sleep in schizophrenia. *Schizophr Res* **180**, 44-47 (2017).
- 1185 108. M. Bencherif, M. K. Stachowiak, A. J. Kucinski, P. M. Lippiello, Alpha7 nicotinic  
1186 cholinergic neuromodulation may reconcile multiple neurotransmitter hypotheses  
1187 of schizophrenia. *Med Hypotheses* **78**, 594-600 (2012).
- 1188 109. J. A. Pratt, B. J. Morris, The thalamic reticular nucleus: a functional hub for  
1189 thalamocortical network dysfunction in schizophrenia and a target for drug  
1190 discovery. *J Psychopharmacol* **29**, 127-137 (2015).
- 1191 110. G. A. Light, D. L. Braff, Human and animal studies of schizophrenia-related  
1192 gating deficits. *Curr Psychiatry Rep* **1**, 31-40 (1999).
- 1193 111. J. V. Patterson *et al.*, P50 sensory gating ratios in schizophrenics and controls: a  
1194 review and data analysis. *Psychiatry Res* **158**, 226-247 (2008).

- 1195 112. F. Ferrarelli *et al.*, Reduced sleep spindle activity in schizophrenia patients. *Am J*  
1196 *Psychiatry* **164**, 483-492 (2007).
- 1197 113. F. Ferrarelli *et al.*, Thalamic dysfunction in schizophrenia suggested by whole-  
1198 night deficits in slow and fast spindles. *Am J Psychiatry* **167**, 1339-1348 (2010).
- 1199 114. E. J. Wamsley *et al.*, Reduced sleep spindles and spindle coherence in  
1200 schizophrenia: mechanisms of impaired memory consolidation? *Biol Psychiatry*  
1201 **71**, 154-161 (2012).
- 1202 115. F. Ferrarelli, G. Tononi, Reduced sleep spindle activity point to a TRN-MD  
1203 thalamus-PFC circuit dysfunction in schizophrenia. *Schizophr Res* **180**, 36-43  
1204 (2017).
- 1205

Figure 1

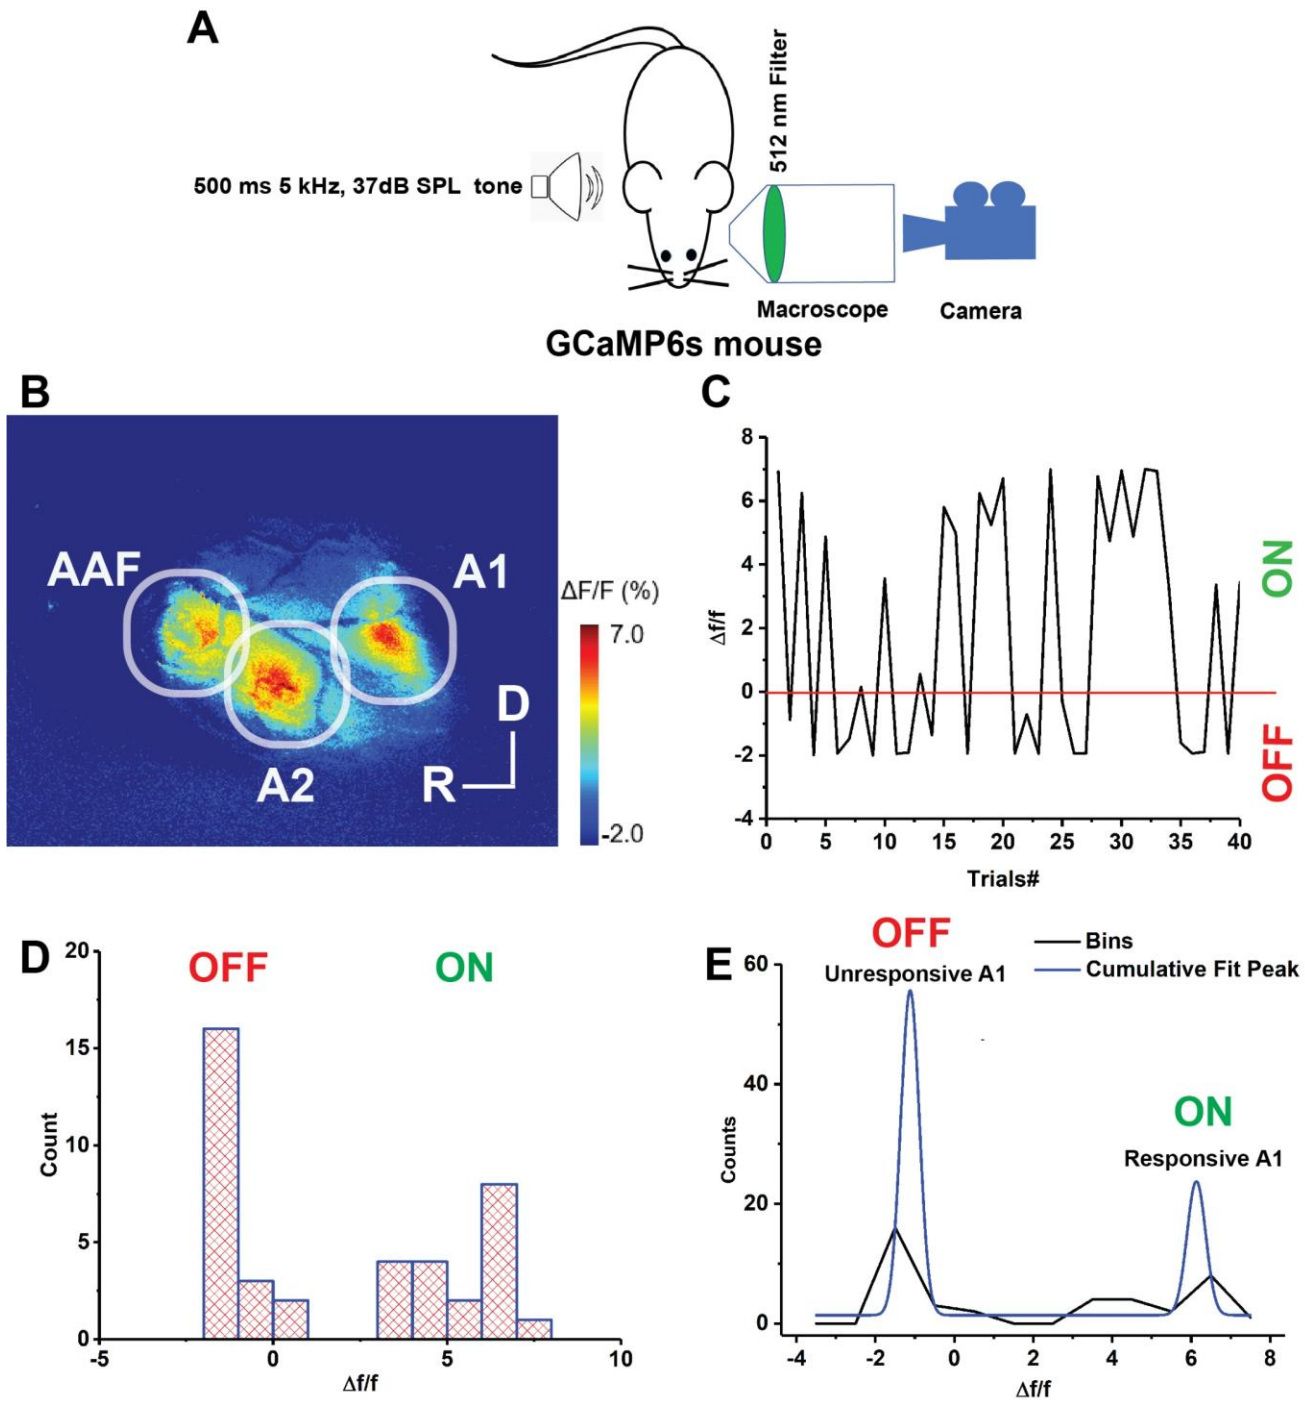

Figure 2

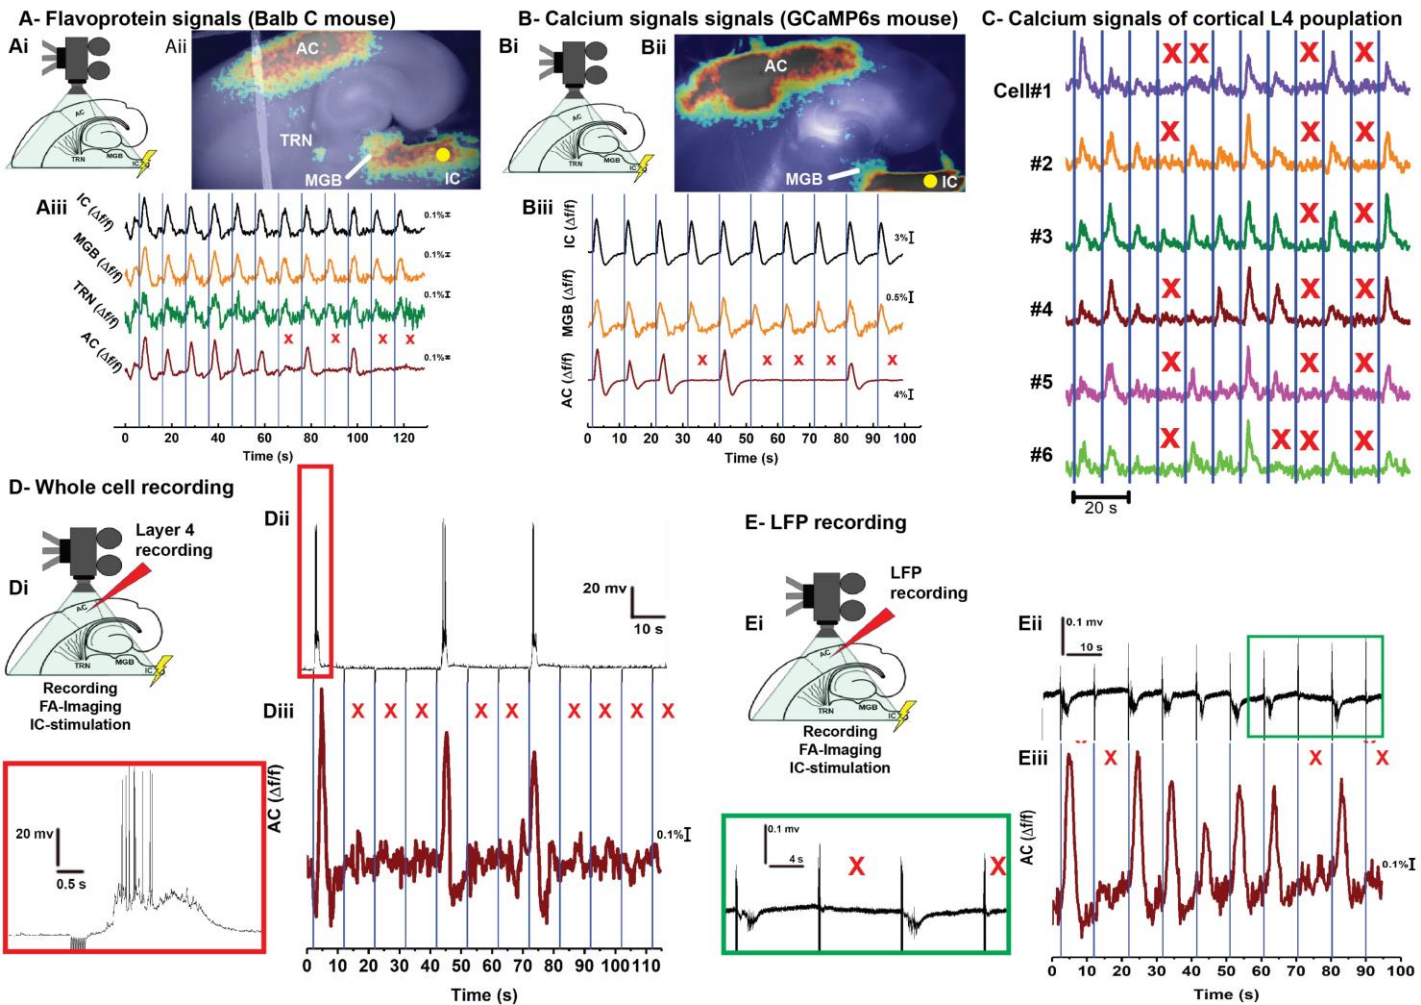

Figure 3

A- Bath application of Gabazine

Ai

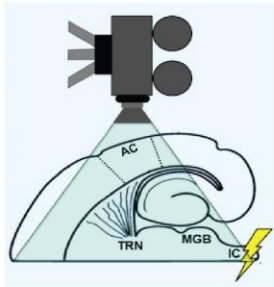

FA-Imaging  
IC-stimulation

Aii Control

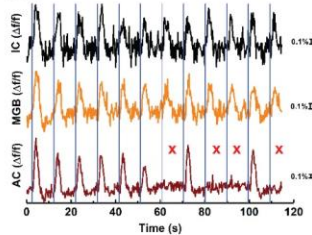

Time traces of FA signals

Aiii Gabazine

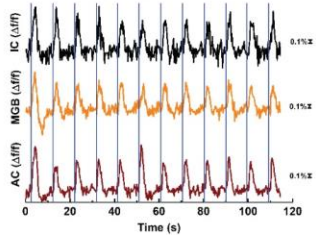

Aiv Wash

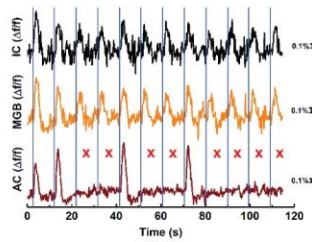

Av

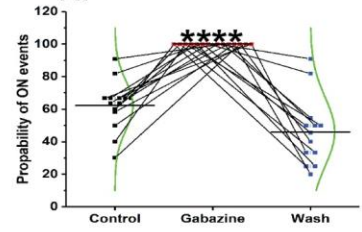

B- IPSCs recordings

Bi

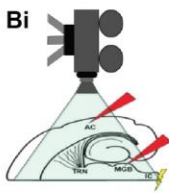

IPSCs/EPSCs  
recording  
FA-Imaging  
IC-stimulation

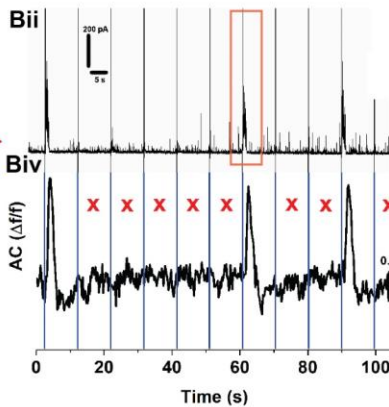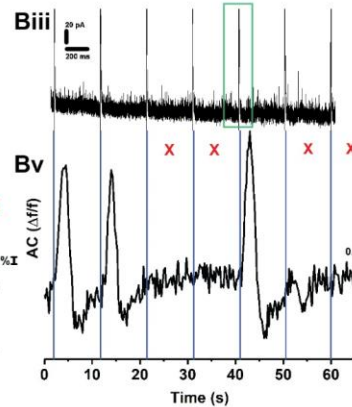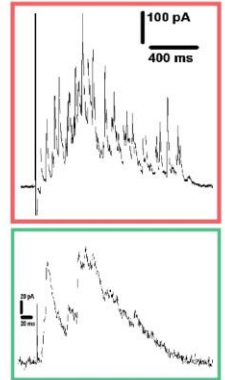

C- Higher thalamic inhibition during OFF cortical responses

Ci

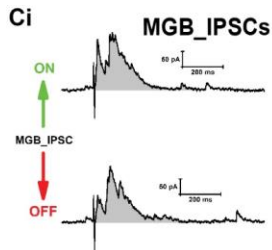

Cii

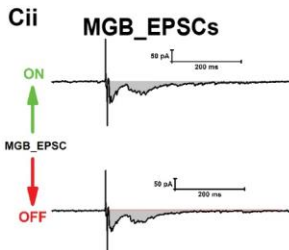

Ciii

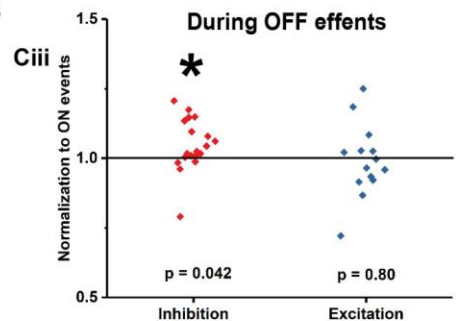

D- Selective application of Gabazine

Di

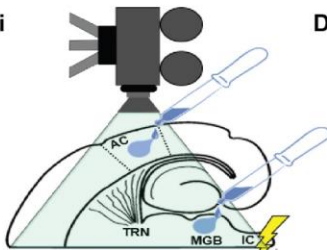

Gabazine selective application  
FA-imaging and IC-stimulation

Dii

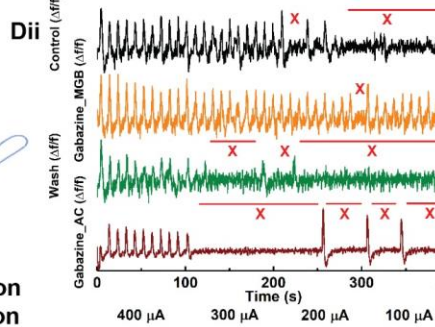

Diii

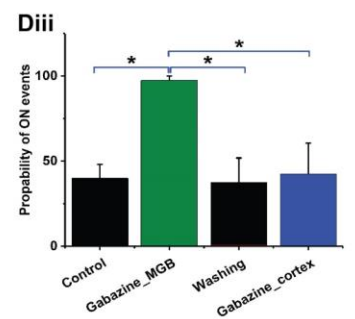



Figure 4

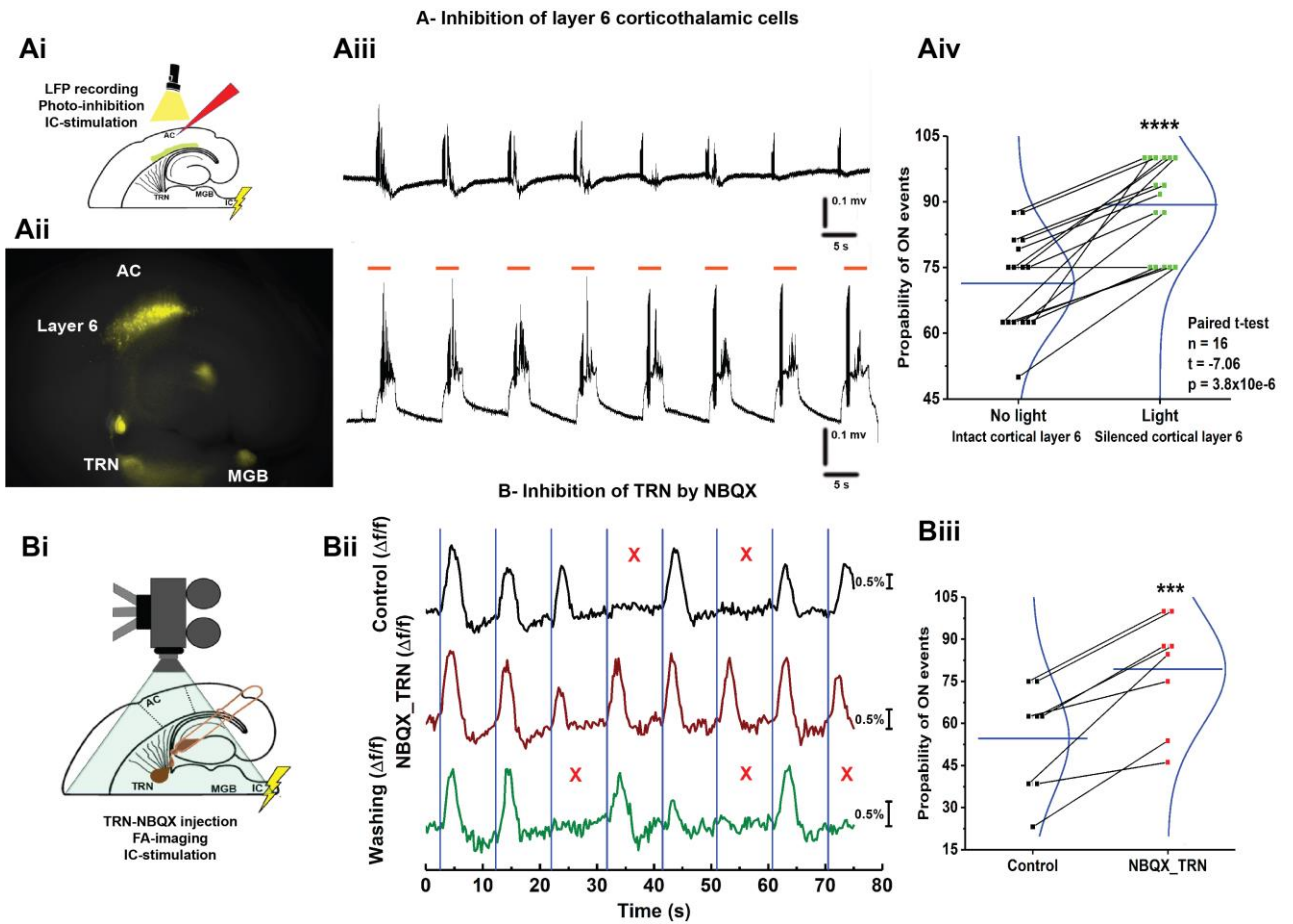

Figure 5

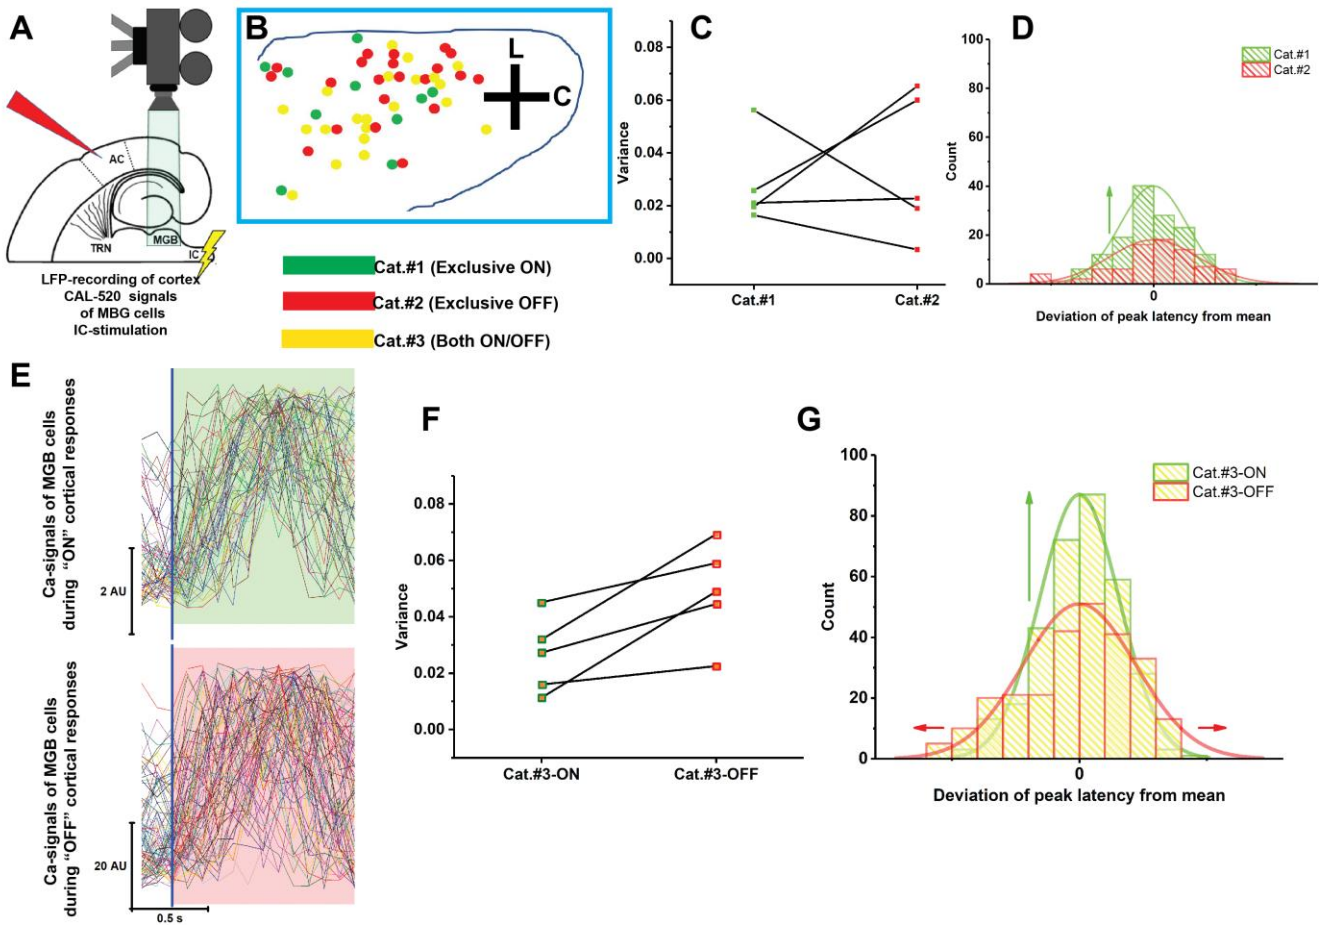

Figure S1

## Auditory Colliculo-Thalamo-cortical (aCTC) mouse brain slice

### Slicing Steps

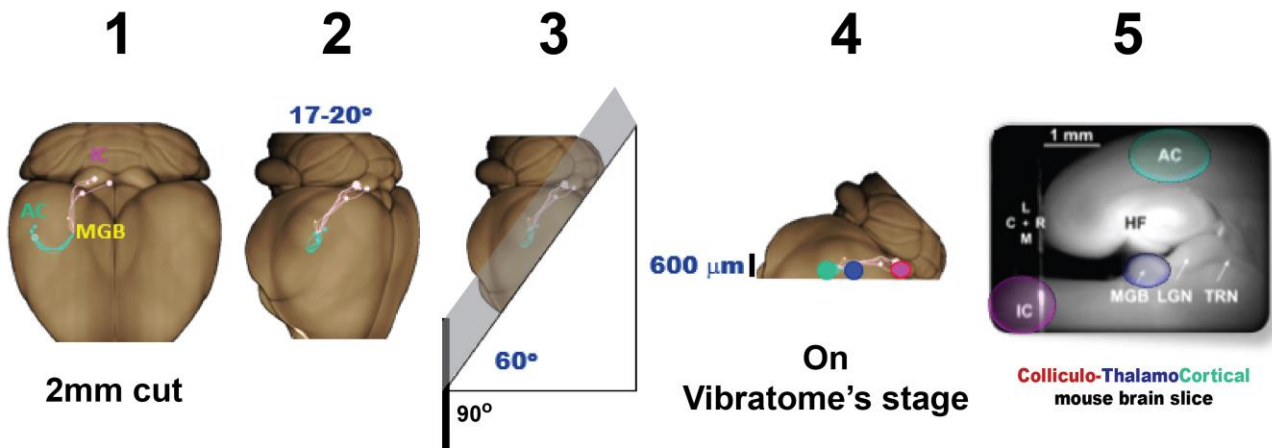

Figure S2

A

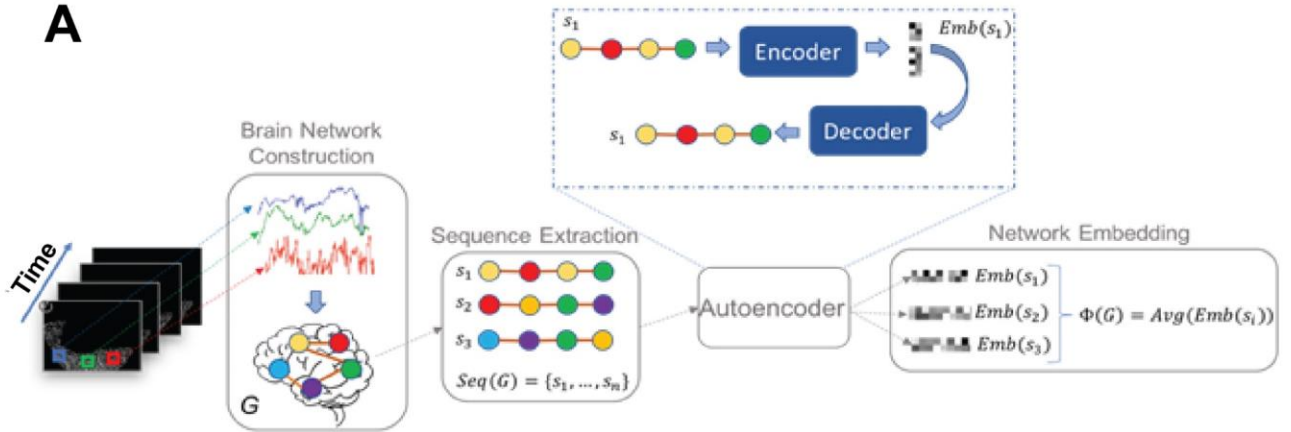

B

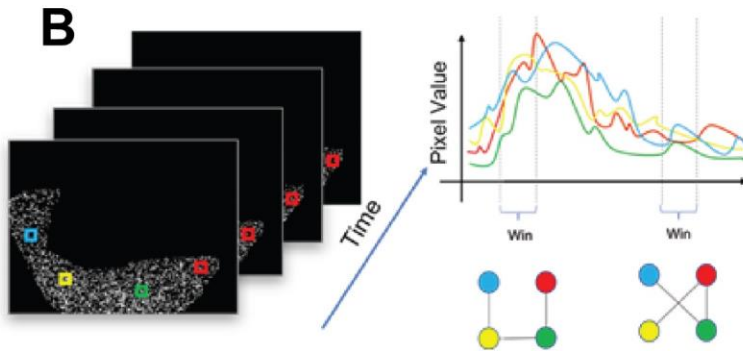

C

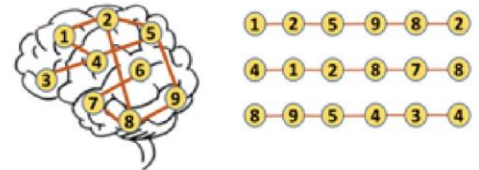

D

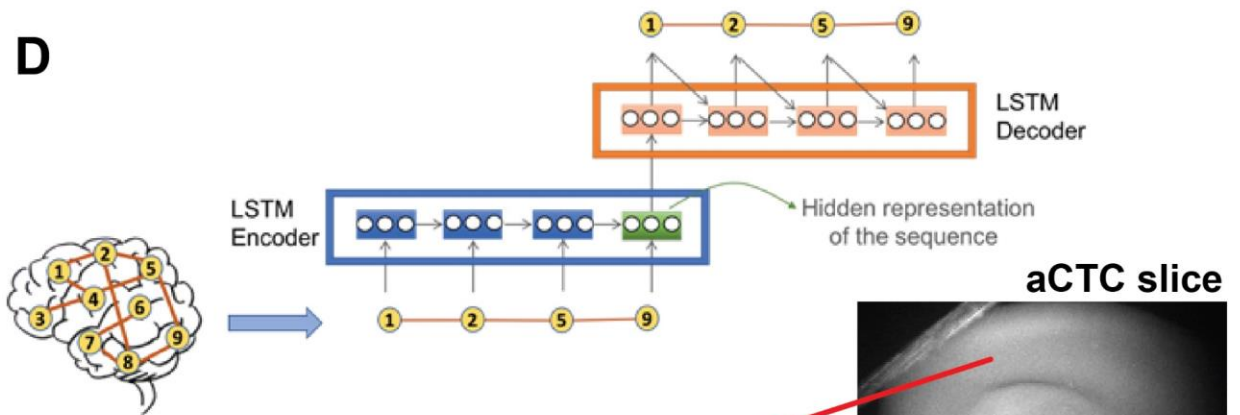

E

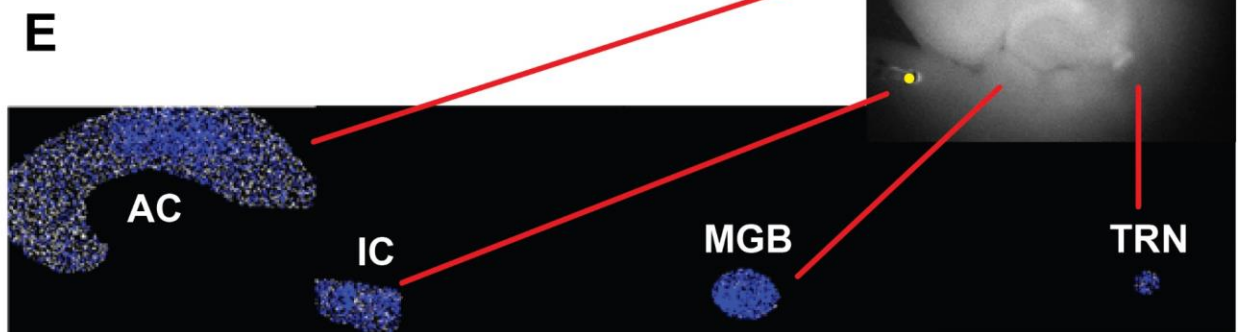

Figure S3

**A- Effect of stimulatory current amplitude**

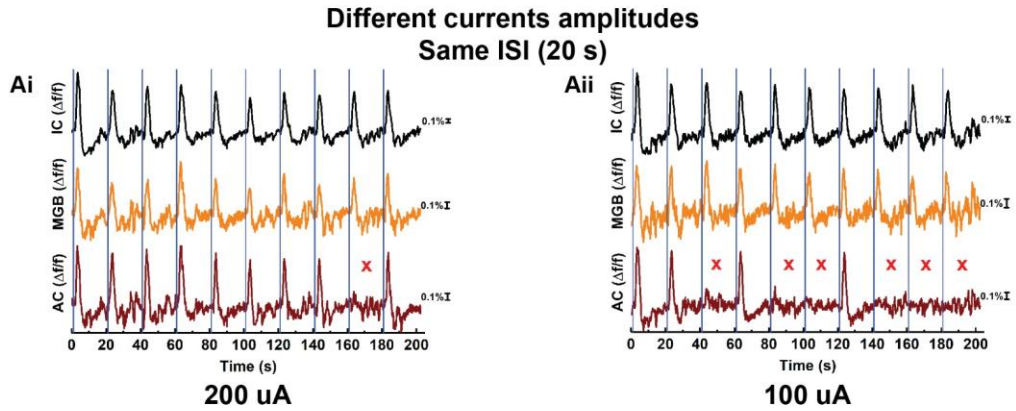

**B- Effect of inter-stimulus-interval**

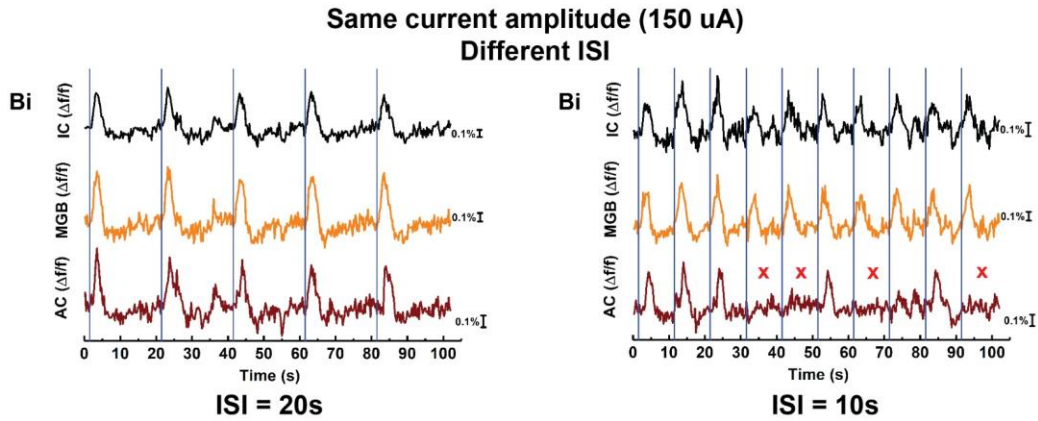

**C- Effect of stimulatory location**

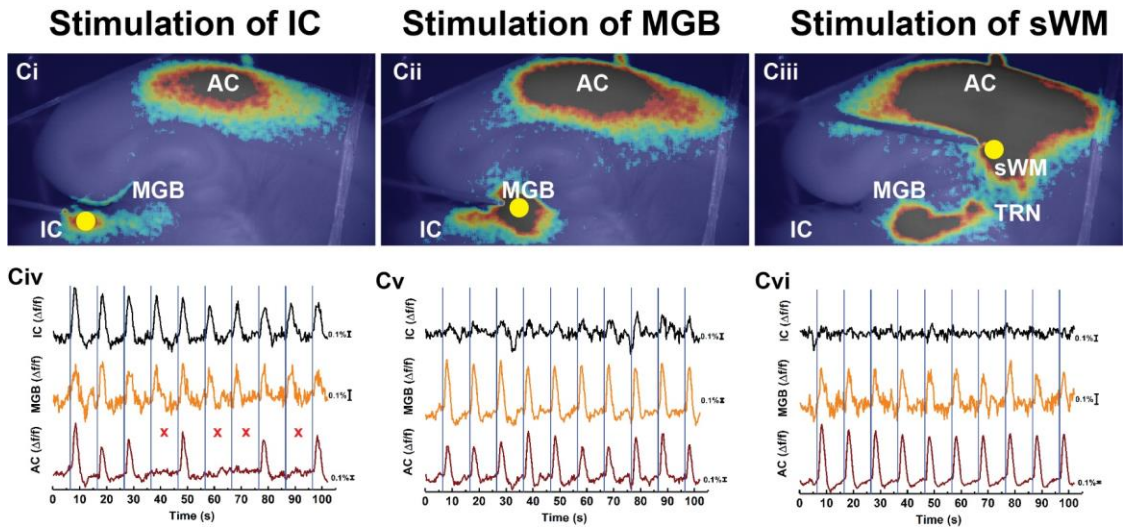

Figure S4

LFP response of AC after the electrical stimulation of IC in aCTC slice

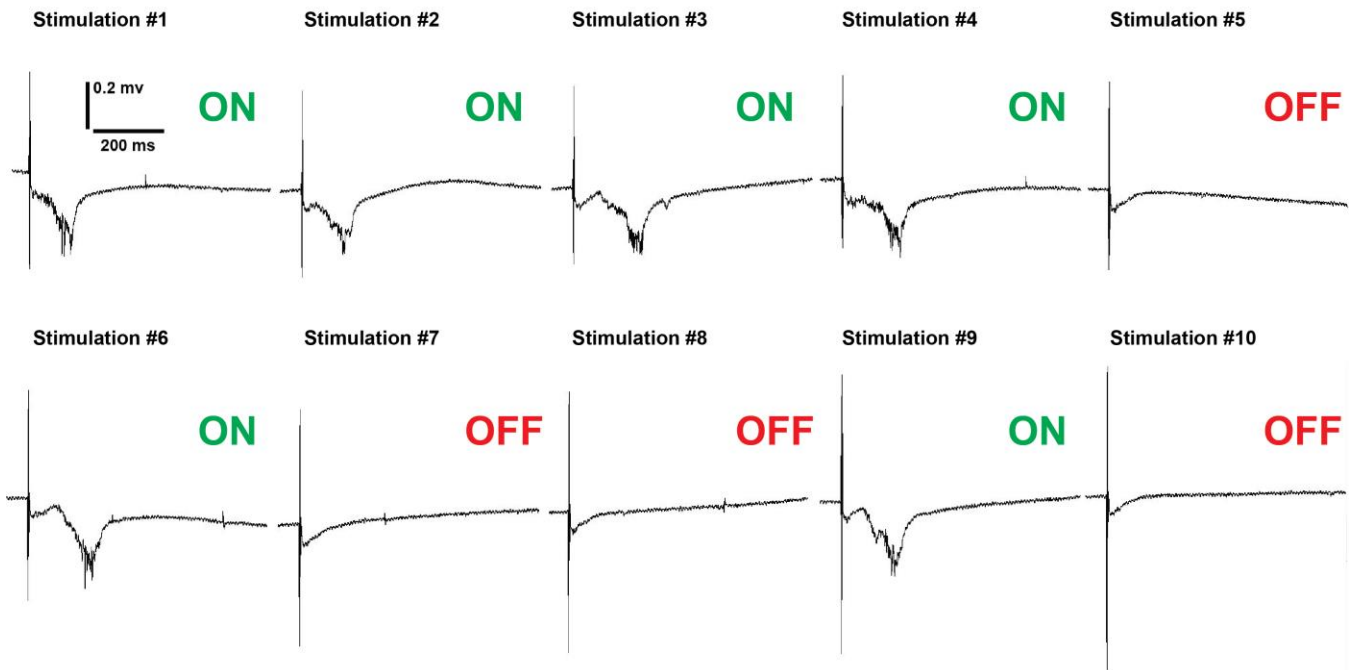

Figure S5

**A**

The expression of halorhodopsin receptor  
in the IC of GAD2-Cre mouse

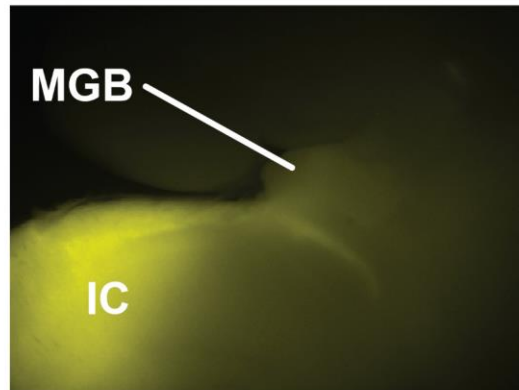

**B**

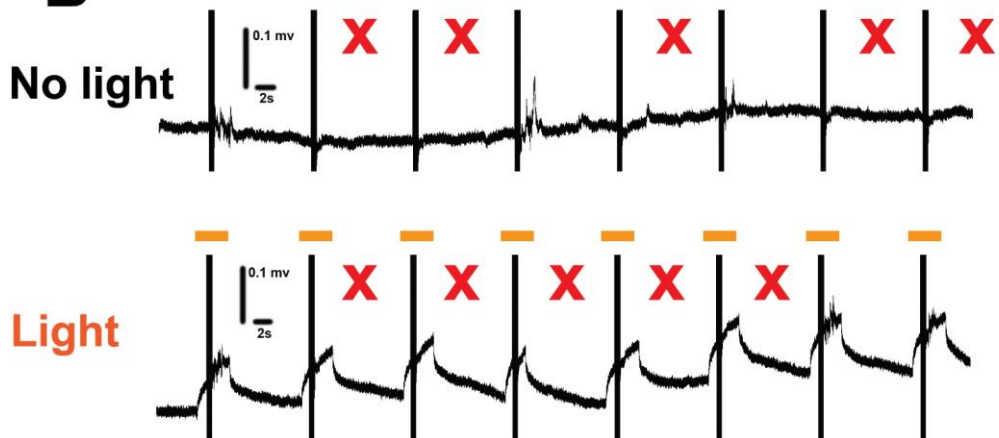

**C**

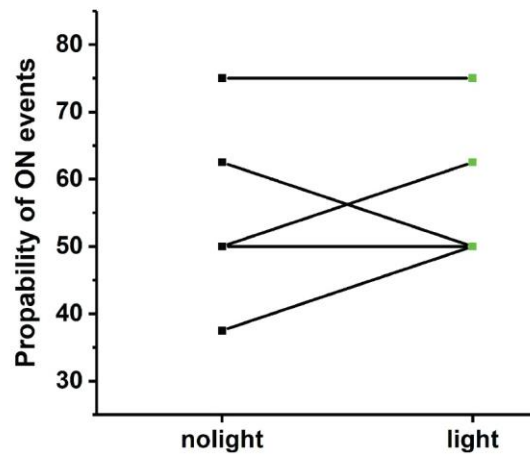

Figure S6

**A**

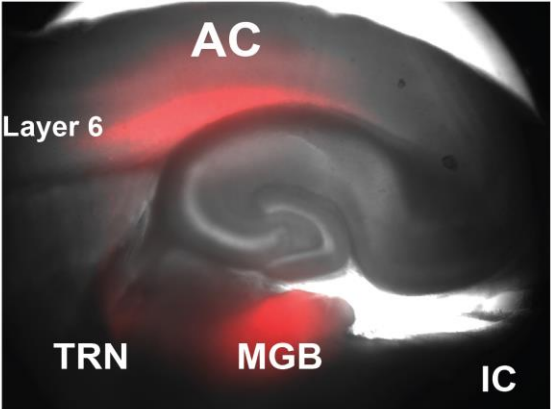

**B**

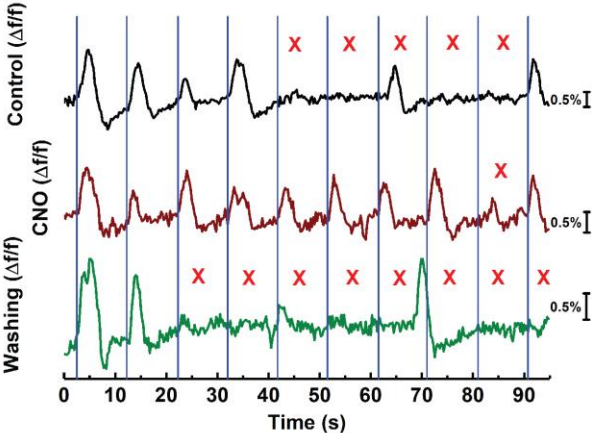

**C**

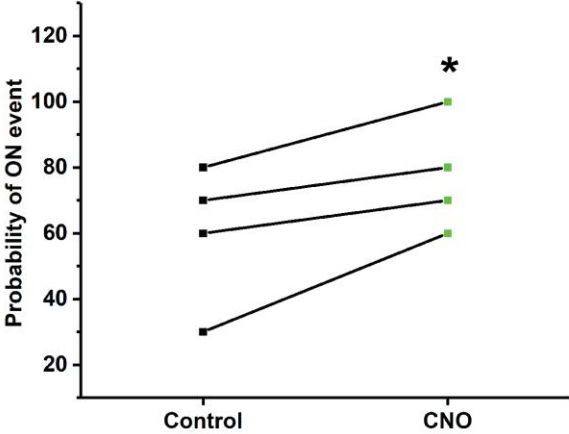



Figure S7

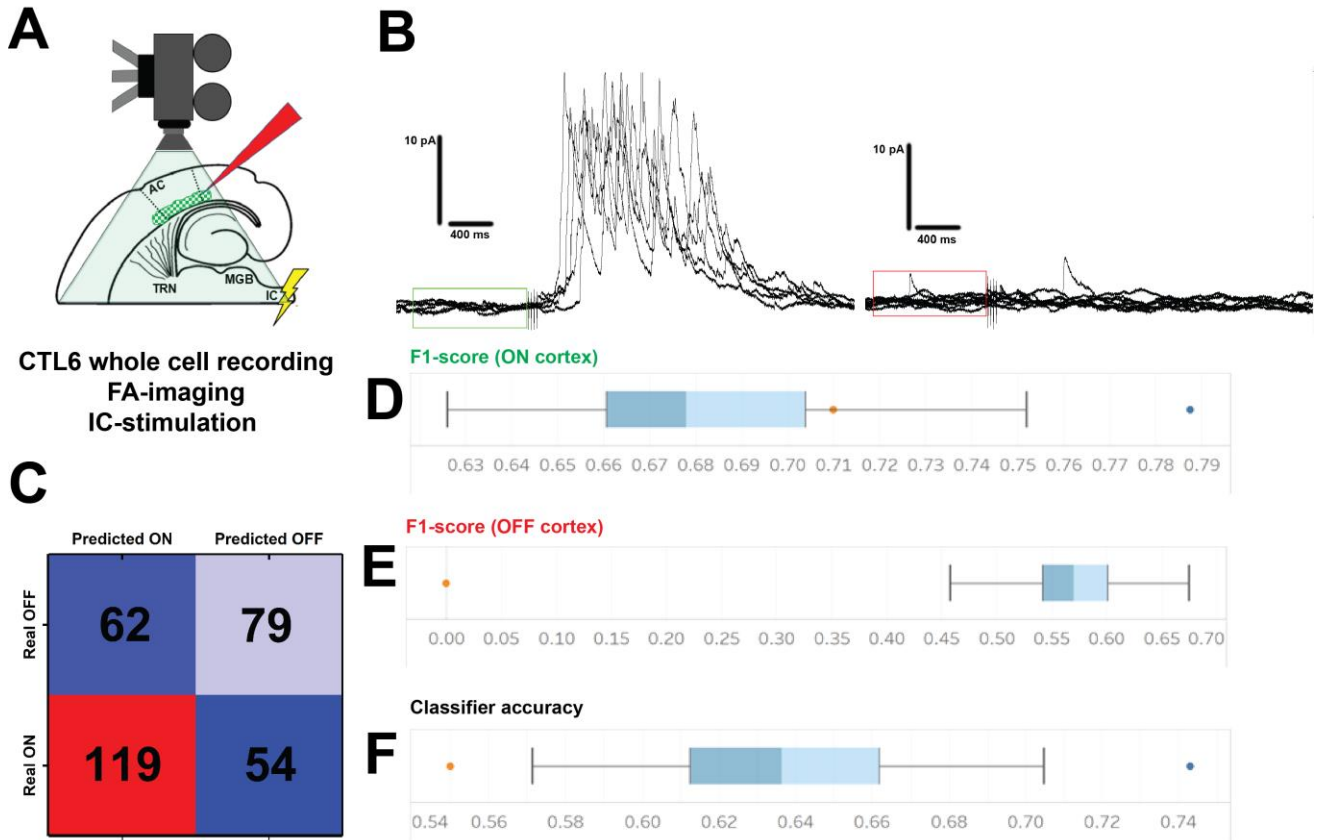

Figure S8

A

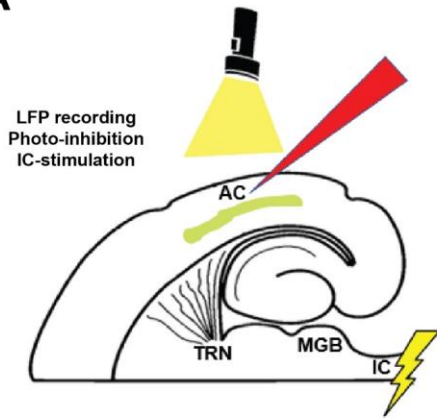

B

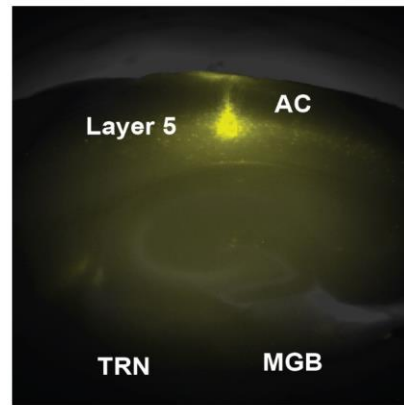

RPB4-cre mouse  
+  
Cre-dependent-eNpHR3.0-YFP

C

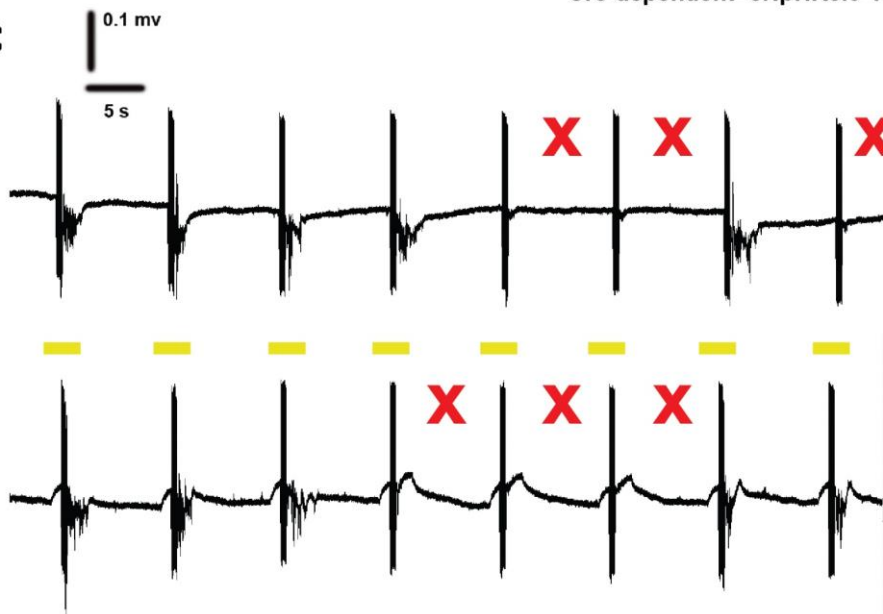

D

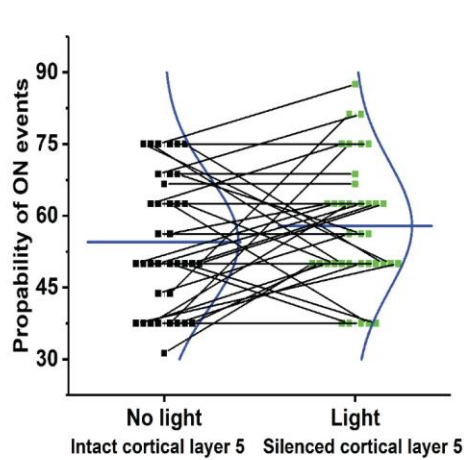

Source: http://biorxiv.org/content/10.1101/625988v1.full.pdf
